# Supplementary material
Source: publisher site journal article supplement (https://www.dovepress.com/article/463128)
Supplement: Supplementary file 1 [file get_supplementary_file.php]

Supplementary Material

**Supplementary S1: Search strategies**

**Supplementary S2: Included articles in this review (n=247)**

**Supplementary S1: Search strategies**

| 1. Pubmed | | |
| --- | --- | --- |
| #1 | Search "Medicine"[MeSH Terms] | |
| #2 | Search "nursing"[MeSH Terms] | |
| #3 | Search(((ChatGPT[Title/Abstract]) OR (Chatbot*[Title/Abstract])) OR (Chat Generative Pre-trained Transformer[Title/Abstract])) OR (large language model[Title/Abstract]) | |
| #4 | Search (((Medic*[Title/Abstract]) OR (nurs*[Title/Abstract])) OR (health*[Title/Abstract])) OR (Diagnosis[Title/Abstract]) | |
| #5 | Search: ((medicine[MeSH Terms]) OR (nursing[MeSH Terms])) OR ((((Medic*[Title/Abstract]) OR (nurs*[Title/Abstract])) OR (health*[Title/Abstract])) OR (Diagnosis[Title/Abstract])) | |
| #6 | Search: (((medicine[MeSH Terms]) OR (nursing[MeSH Terms])) OR ((((Medic*[Title/Abstract]) OR (nurs*[Title/Abstract])) OR (health*[Title/Abstract])) OR (Diagnosis[Title/Abstract]))) AND ((((ChatGPT[Title/Abstract]) OR (Chatbot*[Title/Abstract])) OR (Chat Generative Pre-trained Transformer[Title/Abstract])) OR (large language model[Title/Abstract])) | |
| #7 | Search: ((((medicine[MeSH Terms]) OR (nursing[MeSH Terms])) OR ((((Medic*[Title/Abstract]) OR (nurs*[Title/Abstract])) OR (health*[Title/Abstract])) OR (Diagnosis[Title/Abstract]))) AND ((((ChatGPT[Title/Abstract]) OR (Chatbot*[Title/Abstract])) OR (Chat Generative Pre-trained Transformer[Title/Abstract])) OR (large language model[Title/Abstract]))) AND (("2022/11/30"[Date - Publication] : "2023/8/16"[Date - Publication])) | |
| #8 | Search: (((((medicine[MeSH Terms]) OR (nursing[MeSH Terms])) OR ((((Medic*[Title/Abstract]) OR (nurs*[Title/Abstract])) OR (health*[Title/Abstract])) OR (Diagnosis[Title/Abstract]))) AND ((((ChatGPT[Title/Abstract]) OR (Chatbot*[Title/Abstract])) OR (Chat Generative Pre-trained Transformer[Title/Abstract])) OR (large language model[Title/Abstract]))) AND (("2022/11/30"[Date - Publication] : "2023/8/16"[Date - Publication]))) AND (english[Language]) | |
| 2.CINAHL | | |
| S1 | (MH "Medicine") | |
| S2 | TI nursing OR AB nursing | |
| S3 | S1 OR S2 | |
| S4 | TI Medic* OR TI nurs* OR TI health* OR TI Diagnosis |
| S5 | AB Medic* AB TI nurs* AB TI health* AB TI Diagnosis |
| S6 | S4 OR S5 |
| S7 | S3 OR S6 |
| S8 | TI ChatGPT OR TI Chatbot* OR TI Chat Generative Pre-generative Transformer OR TI large language model |
| S9 | AB ChatGPT OR AB Chatbot* OR AB Chat Generative Pre-generative Transformer OR AB large language model |
| S10 | S8 OR S9 |
| S11 | S7 OR S10 |
| 3. IEEE Xplore | |
| S1 | ("Abstract": ChatGPT) OR ("Abstract": Chatbot*) OR ("Abstract": Chat Generative Pre-trained Transformer) OR ("Abstract":large language model) |
| S2 | ("Abstract": Medic*) OR ("Abstract": nurs*) OR ("Abstract": health) OR ("Abstract": Diagnosis) |
| S3 | ((((Abstract: Medic*) OR (Abstract: nurs*) OR (Abstract: health) OR (Abstract: Diagnosis)))) AND (Abstract: ChatGPT) OR (Abstract: Chatbot*) OR (Abstract: Chat Generative Pre-trained Transformer) OR (Abstract: large language model) |
| 4. Web of Science | |
| #1 | ((((TS=(ChatGPT)) OR TS=(chatbot*)) OR TS=(Chat Generative Pre-trained Transformer)) OR TS=(large language model) |
| #2 | ((((TS=(medic*)) OR TS=(nursing*)) OR TS=(health*)) OR TS=(Diagnosis) |
| #3 | #1 AND #2 |
| #4 | ((#3)) AND DOP=(2022-11-30/2023-08-16) and Preprint Citation index |
| #5 | ((#3)) AND DOP=(2022-11-30/2023-08-16) and English |
| 5. EMBASE | |
| #1 | 'medicine'/exp |
| #2 | 'nursing'/exp |
| #3 | medic*:ab,ti OR nurs*:ab,ti OR health*:ab,ti OR diagnosis:ab,ti |
| #4 | #1 OR #2 OR #3 |
| #5 | 'chatgpt':ab,ti OR 'chatbot*':ab,ti OR 'chat generative pre-trained transformer':ab,ti OR 'large language model':ab,ti |
| #6 | #4 OR #5 |
| #7 | english:la |
| #8 | #6 OR #7 |
| #9 | '2022/11/30-2023/08/16':pd |
| #10 | #8 AND #9 |
| 6.ACM Digital Library | |
|  | [Abstract: "chatgpt"] OR [Abstract: "chatbot*"] OR [Abstract: "chat generative pre-trained transformer"] OR [Abstract: "large language model"] |
|  | [Abstract: "medic*"] OR [Abstract: "nurs*"] OR [Abstract: "health"] OR [Abstract: "diagnosis"] |
|  | [[Abstract: "chatgpt"] OR [Abstract: "chatbot*"] OR [Abstract: "chat generative pre-trained transformer"] OR [Abstract: "large language model"]] AND [[Abstract: "medic*"] OR [Abstract: "nurs*"] OR [Abstract: "health"] OR [Abstract: "diagnosis"]] |
|  | [[Abstract: "chatgpt"] OR [Abstract: "chatbot*"] OR [Abstract: "chat generative pre-trained transformer"] OR [Abstract: "large language model"]] AND [[Abstract: "medic*"] OR [Abstract: "nurs*"] OR [Abstract: "health"] OR [Abstract: "diagnosis"]] AND [E-Publication Date: (11/01/2022 TO 08/31/2023)] |

**Supplementary S2: Included articles in this review (n=247)**

| Author | Journal | Country | Article Type | Topics | Secondary Subject | Benefits and Applications | Drawbacks |
| --- | --- | --- | --- | --- | --- | --- | --- |
| Kim,2023[1] | Cureus | Canada | Report | Clinical practice | Otolaryngology | 1. Increase efficiency | 1. Ethics |
| Galido,2023[2] | Cureus | USA | Report | Health care research | Psychosis | 1. Optimizing treatment for complex diseases in psychiatry | NA |
| Raxwal,2023[3] | Cureus | USA | Report | Clinical practice | NA | 1. A useful tool in the process of academic writing | 1. Misinformation and Lack of reliability  2. Plagiarism |
| Ray,2023[4] | International orthopaedics | India | Editorial | Clinical practice | Orthopaedics | 1. Enhancing efficiency in content generation | 1. Privacy |
| Sharma,2023[5] | Cureus | India | Review | NA | NA | NA | NA |
| Yunhan,2023[6] | Asian journal of psychiatry | China | Editorial | Clinical practice | Mental health | 1. Lowering the barrier to seeking help  2. Facilitating the treatment processes  3. Enhancing post-treatment recovery and healthy lifestyle development | 1. Privacy  2. Transparency  3. Plagiarism |
| Baumgartner,2023[7] | Clinical and translational medicine | Austria | Commentary | Clinical practice | NA | 1. Healthcare decisions | 1. Others |
| Bosbach,2023[8] | Current problems in diagnostic radiology | Bern | Experimental study | Clinical practice | Radiology | NA | 1. Algorithmic bias |
| Cao,2023[9] | American journal of roentgenology | USA | Research letter | Clinical practice | Hepatobiliary surgery | NA | 1. Misinformation and Lack of reliability |
| Siqi,2023[10] | Annals of biomedical engineering | China | Editorial | Clinical practice | Clinical Medical Devices | 1. Enhancing design automation  2. Saves time and resources  3. Quality Assurance  4. Integration of Expert Knowledge  5. Collaboration and Brainstorming  6. Training and Documentation  7. Process Optimization  8. Material Selection  9. Supply Chain Management  10. Continuous Improvement | 1. Privacy  2. Ethics  3. Limited knowledge  4. Legal Responsibility  5. Overreliance |
| Au Yeung,2023[11] | Frontiers in digital health | USA | Perspective | Clinical practice | NA | 1. Assist doctors in decision-making | 1. Ethics  2. Misinformation and Lack of reliability |
| Anderson,2023[12] | BMJ open sport & exercise medicine | Australia | Editorial | NA | NA | 1. Generate academic papers | 1. Academic dishonesty  2. Lack of consistency  3. Ethics |
| Hamdoun,2023[13] | IEEE Technology and Society Magazine | USA | Others | NA | Mental health | NA | 1. Privacy |
| Lewandowski,2023[14] | Clinical and experimental dermatology | Poland | Original study | Medical education | Dermatology | NA | 1. Limited accuracy  2. Misinformation and Lack of reliability  3. Ethics  4. Transparency |
| Agarwal,2023[15] | Cureus | India | Original article | Medical education | Physiology | 1. Lower text similarity index  2. Query medical knowledge | NA |
| Gupta,2023[16] | Aesthetic surgery journal | USA | Editorial | Clinical practice | NA | 1. Process and respond to commands in a humanistic fashion by acknowledging shortcomings | 5. Limited accuracy |
| Schukow,2023[17] | Advances in anatomic pathology | USA | Review | Clinical practice | Diagnostic Pathology | 1. Improved scientific writing  2. Elevated research equity, versatility, and efficiency  3. Improved day-to-day practice (eg, cost savings, streamlined workflow, patient health literacy)  4. Enhanced education | 1. Ethics,  2. Legal responsibility  3. Limited accuracy  4. Limited knowledge  5. Privacy |
| Morita,2023[18] | Frontiers in Public Health | Canada | Opinion | Clinical practice | Public health | 1. Provide personalized health information and support to individuals.  2. Process and analyze large amounts of data quickly and accurately  3. Inform decision-making, help anticipate challenges, and guide the development of ethical guidelines  4. maximize the benefits and mitigate potential risks associated with ChatGPT’s implementation in the public health domain. | 1. Misinformation and Lack of reliability  2. Privacy  3. Biased |
| Aubignat,2023[19] | Revue neurologique | France | Editorial | Medical education | NA | 1. Patient education and symptom management  2. Inform the public about health issues  3. Access to a wider range of educational resources | 1. Misinformation and Lack of reliability  2. Ethics |
| Fayed,2023[20] | Journal of experimental orthopaedics | USA | Experimental study | Health care research | Orthopaedics, Sports medicine | 1. Improve efficiency  2. Strengthen the physician–patient relationship | 1. Biased  2. Limited accuracy  3. Misinformation and Lack of reliability |
| Valentín-Bravo,2023[21] | Archivos de la Sociedad Española de Oftalmología (English Edition) | UK | Experimental study | Health care research | Ophthalmology | 1. Saving in time and effort in searching for information  2. Improve the accuracy and quality of scientific texts | 1. Ethics  2. Legal responsibility  3. Limited knowledge |
| Deiana,2023[22] | Vaccines | Italy | Quantitative study | Health care research | Vaccines, immunization | NA | 1. Limited accuracy  2. Transparency  3. Ethics |
| Dahmen,2023[23] | Knee surgery sports traumatology arthroscopy | Netherlands | Opinion | Health care research | NA | 1. Generate new ideas  2. Assist in the development of clinical decision | 1. Plagiarism  2. Limited accuracy  3. Biased |
| Yanqiu,2023[24] | Annals of biomedical engineering | USA | Editorial | Clinical practice | Intensive Care Medicine | 1. Optimizing clinical decision-making | NA |
| McLean,2023[25] | Annals of biomedical engineering | Germany | Editorial | NA | NA | NA | 1. Ethics  2. Legal responsibility  3. Privacy |
| Kao,2023[26] | Medicine | China | Experimental study | Clinical practice | Pediatrics | 1. Improve the clinical workflow  2. Assist in clinical decision-making | NA |
| Shay,2023[27] | British journal of anaesthesia | USA | Editorial | Clinical practice | NA | 1. Provide patients with real-time, personalized education and support  2. Help patients understand complex medical information  3. Accessibility  4. Provide patients with a broad range of information and perspectives  5. Providing personalized education and support | 1. Misinformation and Lack of reliability  2. Limited accuracy  3. Ethics, Privacy |
| Morreel,2023[28] | Medical teacher | UK | Editorial | Medical education | Medicine exam | NA | NA |
| Yuki,2023[29] | New England Journal of Medicine | Brazil | Commentary | NA | NA | NA | NA |
| Najafali,2023[30] | Aesthetic surgery journal | USA | Editorial | Medical education | NA | 1. Reviewing grants and expediting the responsible review process | 1. Ethics  2. Plagiarism  3. Misinformation and Lack of reliability |
| Coskun,2023[31] | Urology | Turkey | Experimental study | Medical education | Urology | 1. Provide quick and convenient access to information | 1. Misinformation and Lack of reliability  2. Limited accuracy |
| Nune,2023[32] | Rheumatol int | UK | Correspondence | NA | Rheumatology | NA | 1. Others  2. Privacy  3. Misinformation and Lack of reliability |
| Colletti,2023[33] | Clinical nuclear medicine | India | Editorial | Health care research | NA | 1. Help authors with literature searches | 1. Lack of human interaction and emotions |
| Howard,2023[34] | Lancet infectious diseases | UK | Others | Clinical practice | NA | 1. Write a summary | 1. Misinformation and Lack of reliability  2. Lack of consistency |
| Ferdush,2023[35] | Annals of biomedical engineering | Bangladesh | Review | Clinical practice | NA | 1.Help to provide clinical decision making | 1. Biased  2. Lack of human interaction and emotions |
| Jeha,2023[36] | The Journal of investigative dermatology | USA | News and perspectives | Clinical practice | Dermatology | 1. Patient education, Patient Communication, Triage, and Clinical Documentation | 1.Misinformation and Lack of reliability  2. Algorithmic bias |
| Kim,2023[37] | Journal of pediatric urology | Canada | Review | Clinical practice | NA | 1. Paramedical Writing | 1. Ethics  2. Limited accuracy  3. Misinformation and Lack of reliability |
| Temsah,2023[38] | Healthcare | Saudi Arabia | Cross-sectional study | Health care research | NA | 1. Help enhance HCWs’ trust in its ability to generate medical decisions  2. Assist in identifying potential improvements, and offer unique perspectives | 1. Misinformation and Lack of reliability  2. Privacy |
| Songwei,2023[39] | Academic medicine : journal of the Association of American Medical Colleges | China | Editorial | Medical education | Medical education. | 1. Students can easily and quickly look up information on any topic  2. Provide personalized learning experiences | 1. Biased |
| Weng,2023[40] | Journal of the Chinese Medical Association | China | Experimental study | Medical education | NA | 1. Integrate text, extract key points, and understand meaning | 1. Limited knowledge |
| Fatani,2023[41] | Cureus | The Arabian Peninsula | Review | Health care research | Dentistry | 1. Assist in finding academic papers, summarizing their conclusions  2. Highlight areas of uncertainty, understand information quickly and connect evidence to reach conclusions faster | 1. Ethics  2. Others |
| Jin,2023[42] | Journal of the American Academy of Dermatology | USA | Review | Medical education | Dermatology | 1. Supporting clinical functions and patient education,  2. Improve health literacy | 1. Misinformation and Lack of reliability |
| Reis,2023[43] | International braz j urol | Brasil | Editorial | Clinical practice | Urology | 1. It can help improve the accuracy and efficiency of medical diagnosis and treatment  2. ChatGPT can also assist with patient education by generating easy-to-understand explanations of medical conditions and treatments  3. ChatGPT can help ensure that the language used in a medical document is grammatically correct and easy to understand  4. ChatGPT can be a valuable resource for urological scientists looking to improve the quality and effectiveness of their work  5. Provide information on a wide range of topics | 1. Misinformation and Lack of reliability  2. Biased  3. Limited accuracy |
| Hanyao,2023[44] | International journal of oral science | China | Review | Health care research | Dentistry | 1. Promoted clinical applications by improving patient outcomes  2. Streamlining processes  3. Reducing costs | NA |
| Oh,2023[45] | Annals of surgical treatment and research | Korea | Others | Clinical practice | General surgery | 1. Comprehensive understanding of complex clinical scenarios  2. Assisting professionals in their decision-making processes and contributing to improved patient care | NA |
| Wenbo,2023[46] | Annals of biomedical engineering | China | Editorial | Clinical practice | Colorectal Surgery | 1. Enhance medical education and training in the field of colorectal surgery  2. Provide preoperative support in colorectal surgery  3. Enhance intraoperative decision‐making in colorectal surgery  4. Enhance postoperative care in colorectal surgery | 1. Privacy  2. Ethics  3. Biased |
| Alhaidry,2023[47] | Cureus | Saudi Arabia | Review | Clinical practice | Dentistry | 1. Diagnoses and disease prediction | 1. Privacy  2. Others |
| Haemmerli,2023[48] | BMJ health & care informatics | Switzerland | Experimental study | Clinical practice | Oncology | 1. Assist in clinical decision-making | 1. Limited knowledge |
| Kleebayoon,2023[49] | Clinical medicine (London, England) | India | Editorial | Clinical practice | NA | NA | 1. Misinformation and Lack of reliability  2. Plagiarism |
| Darzidehkalani,2023[50] | Radiology | UK | Editorial | Medical education | NA | NA | 1. Limited accuracy |
| Dave,2023[51] | Frontiers in artificial intelligence | India | Editorial | Health care research | Medicine, healthcare | NA | 1. Plagiarism  2. Ethics  3. Legal responsibility  4. Biased |
| Parsa,2023[52] | The archives of bone and joint surgery | Iran | Editorial | Health care research | NA | 1. Facilitate writing course syllabi, advice for learning activities, lecture presentation and act as smart assist with student assessment, quiz, and test questions  2. Faculties can create automatic grading and feedback to students | 1. Limited knowledge  2. Privacy  3. Biased |
| Laudicella,2023[53] | Clinical and translational imaging | Italy | Cross-sectional study | Clinical practice | Nuclear medicine, Radiology | 1. Increase efficiency | 1. Transparency |
| Arachchige,2023[54] | Clinical and translational imaging | Italy | Letter to editors | Clinical practice | Nuclear medicine | 1. Efficiency in Manuscript Outlining  2. Potential in Test Development | 1. Lack of consistency |
| Ray,2023[55] | Canadian association of radiologists journal | India | Editorial | Clinical practice | Radiology | NA | NA |
| Bhattacharya,2023[56] | Indian journal of surgery | India | Review | Clinical practice | Surgical | 1. Helping with clinical decision-making  2. Analyzing patient data  3. Advise on the individualized management of postoperative pain and other symptoms  4. Suggest the most appropriate anesthetic or dose for surgical interventions | 1. Lack of human interaction and emotions |
| Choudhary,2023[57] | Travel medicine and infectious disease | India | Editorial | Clinical practice | Travel medicine | 1. Provide real-time information on disease outbreaks and health risks in various destinations.  2. Offer guidance on staying healthy during a trip | 1. Limited accuracy |
| Humar,2023[58] | Aesthetic surgery journal | USA | Experimental study | Medical education | Plastic  Surgery | NA | 1. Limited accuracy  2. Algorithmic bias |
| Meo,2023[59] | Healthcare | Saudi Arabia | Cross-sectional study | Medical education | NA | 1. Enhance scientific knowledge, Generate an essay, and Provide explanations  2. Answer questions, provide explanations, offer suggestions, create conversational 1dialogues and assist with multiple tasks | NA |
| Li,2023[60] | American journal of obstetrics and gynecology | Singapore | Others | Medical education | Obstetrics and gynecology | 1. Increase efficiency | NA |
| Mbakwe,2023[61] | PLOS digital health | USA | Editorial | Medical education | NA | NA | 1. Lack of human interaction and emotions |
| Oztermeli,2023[62] | Medicine | Turkey | Observational study | Medical education | NA | 1. Reduce the workload of doctors  2. Help with the effective use of the workforce  3. Alleviating the workload of health professionals | NA |
| Deebel,2023[63] | Urology | USA | Experimental study | Clinical practice | Urology | NA | 1. Limited accuracy |
| Khan,2023[64] | Pakistan journal of medical sciences | pakistan | Opinion | Medical education | NA | 1. Assist in the management of patient data | 1. Lack of human interaction and emotions  2. Limited knowledge |
| Skalidis,2023[65] | European heart journal. Digital health | Switzerland | Report | Medical education | NA | 1. Able to effectively process medical information and provide appropriate answers to questions | 1. Lack of human interaction and emotions |
| O’Hern,2023[66] | Jaad international | USA | Editorial | Clinical practice | Plastic surgery | 1. Promising to improve efficiency for appropriate triage of diagnosis and treatment | 1. Others |
| Ventriglio,2023[67] | International Journal of Social Psychiatry | Italy | Editorial | Medical education | Social psychiatry | 1. Improve the quality of education | NA |
| Hristidis,2023[68] | Journal of medical Internet research | USA | Experimental study | Clinical practice | Dentistry | NA | 1. Misinformation and Lack of reliability |
| Kleebayoon,2023[69] | ACR open rheumatology | Cambodia | Editorial | Medical education | NA | NA | 1. Misinformation and Lack of reliability  2. Plagiarism |
| Kleebayoon,2023[70] | Annals of biomedical engineering | Cambodia | Editorial | Clinical practice | NA | NA | 1. Misinformation and Lack of reliability  2. Plagiarism  3. Ethics |
| Kunming,2023[71] | International Journal of Surgery | China | Editorial | Clinical practice | Oncology | 1. Analysing clinical data  2. Helps surgical oncologists record and extract information, medical history, test results, treatment options and surgical procedures  3. Reduced the burden on occupational physicians but alsogave an important reference for preoperative planning | NA |
| Dahdah,2023[72] | Annals of biomedical engineering | Cleveland | Experimental study | Health care research | Cardiovascular Disease | 1. Save time and resources  2. Deliver appropriate and safe advice | 1. Limited accuracy |
| Ebrahimi,2023[73] | International Journal of Radiation Oncology*Biology*Physics | USA | Experimental study | Health care research | Oncology | 1. Streamline tedious administrative tasks  2. Summarize lengthy reading materials | 1. Limited accuracy |
| Moons,2023[74] | European journal of cardiovascular nursing | Belgium | Editorial | Clinical practice | Cardiovascular Nurses | 1. Generate natural language text  2. Summarize large amounts of data and answer specific questions | NA |
| Imran,2023[75] | Pakistan journal of medical sciences | Pakistan | Others | Clinical practice | Mental Health | 1. Help in reducing prescription errors  2. Saving clinician’s time  3. Reduction in Occupational stress | 1. Biased  2. Lack of human interaction and emotions |
| Gandhi Periaysamy,2023[76] | Annals of medicine and surgery (2012) | India | Editorial | Medical education | NA | 1. Creating abstracts of the articles and literature review.  2. Provide the codes for running specific statistical tests in software | 1. Limited knowledge |
| Armitage,2023[77] | Postgraduate medical journal | UK | Others | NA | NA | NA | NA |
| Gerli,2023[78] | Panminerva med | Italy | Others | Clinical practice | NA | NA | NA |
| Xiaoni,2023[79] | Journal of Translational Medicine | China | Editorial | Medical education | NA | 1. Assist in clinical training and education, thereby more effectively guiding doctors’ clinical skills, optimizing the education system, and improving medical skills  2. Alleviate the problem of human resource shortage when training real SP | NA |
| Temsah,2023[80] | Cureus | Saudi Arabia | Editorial | Health care research | NA | NA | 1. Misinformation and Lack of reliability  2. Privacy |
| Barash,2023[81] | Journal of the American College of Radiology | Israel | Retrospective study | Clinical practice | Emergency, Radiology | 1. Reduce health care costs  2. Decrease the risk for adverse events  3. Improve the quality and accuracy of radiology reports | 1. Legal responsibility  2. Misinformation and Lack of reliability  3. Biased |
| Castro,2023[82] | Dermatologie (heidelb) | USA | Others | Clinical practice | Dermatology | 1. Enhance diagnostic accuracy  2. Saving precious time and resources  3. Potentially improving patient outcomes  4. AI could bridge gaps in regions with limited healthcare resources, providing essential diagnostic support  5. Faster, potentially more accurate diagnoses could enhance patient care, reducing anxiety and expediting treatment | 1. Privacy |
| Ali,2023[83] | European journal of dental education : official journal of the Association for Dental Education in Europe | Qatar | Original article | Medical education | Dentistry | 1. Provide a personalized learning experience | 1. Misinformation and Lack of reliability  2. Academic dishonesty |
| Uprety,2023[84] | Cancer | USA | Opinion | Clinical practice | Oncology | 1. Refined to review a patient’s clinical features and prior therapies | NA |
| Lakshman,2023[85] | Indian journal of surgery | India | Editorial | Medical education | NA | 2. Academic writing | 1. Biased  2. Limited accuracy  3. Ethics  4. Plagiarism |
| Golan,2023[86] | Cureus | USA | Cross-sectional study | Clinical practice | NA | 1. Enhance efficiency and  2. Enable users to access a larger volume of information in less time | 1. Limited accuracy |
| Jing,2023[87] | Annals of biomedical engineering | Malaysia | Editorial | NA | NA | 1. Enhance healthcare service efficiency and accessibility,  2. Curtail healthcare costs  3. Deliver personalized health recommendations | 1. Privacy  2. Lack of human interaction and emotions |
| Santana,2023[88] | Oral diseases | Brazil | Editorial | Clinical practice | Oral Medicine | 1. Significant reduction in misdiagnosis  2. Enhancing current diagnosis workflows and contributing to the early diagnosis of oral diseases | NA |
| Mungmunpuntipantip,2023[89] | Journal of the Chinese Medical Association | Thailand | Editorial | Medical education | NA | NA | 1. Ethics |
| Vasilchenko,2023[90] | International Journal of Social Psychiatry | Israel | Editorial | Medical education | Social Psychiatry | 1. Facilitate discussions and debates, answering questions, providing case studies, and facilitating collaboration and teamwork | 1. Algorithmic bias  2. Ethics |
| Ayers,2023[91] | Jama internal medicine | USA | Cross-sectional study | Clinical practice | NA | 1. Save time  2. Promote equitable access to health resources  3. Improve patient outcomes | 1. Ethics |
| Ayoub,2023[92] | Jama otolaryngology-head & neck surgery | USA | Qualitative research | Medical education | NA | NA | 1. Algorithmic bias |
| Nayak,2023[93] | Jama internal medicine | USA | Editorial | Clinical practice | NA | NA | NA |
| Alser,2023[94] | American Journal of Medicine Open | Egypt | Point | NA | NA | NA | 1. Plagiarism  2. Biased |
| Kleebayoon,2023[95] | Journal of neurointerventional surgery | India | Editorial | Medical education | NA | NA | 1. Ethics  2. Biased |
| Yeo,2023[96] | Clinical and molecular hepatology | USA | Editorial | NA | NA | NA | NA |
| Woodnutt,2023[97] | Journal of Psychiatric and Mental Health Nursing | UK | Others | Clinical practice | NA | NA | NA |
| Li,2023[98] | Clin imaging | USA | Report | Clinical practice | Radiology | 1. Increase efficiency | 1. Limited accuracy  2. Misinformation and Lack of reliability |
| Kulkarni,2023[99] | The Journal of the Association of Physicians of India | India | Editorial | Clinical practice | NA | NA | 1. Ethics |
| Teperikidis,2023[100] | Acta cardiologica | Greece | Review | Clinical practice | NA | NA | NA |
| Lebhar,2023[101] | The Cleft palate-craniofacial journal : official publication of the American Cleft Palate-Craniofacial Association | USA | Cross-sectional study | Medical education | Surgical | 1. Increase efficiency  2. Medical writing | 1. Limited accuracy  2. Misinformation and Lack of reliability |
| Molligoda Arachchige,2023[102] | Clinical medicine(lond) | Germany | Opinion | NA | NA | NA | NA |
| Arachchige,2023[103] | Clinical medicine(lond) | Italy | Letter to editors | Medical education | NA | 1. Expedite research and publication processes  2. Assist educators in developing medical school and residency programmed assessments | 1. Ethics |
| Bilal,2023[104] | Annals of biomedical engineering | Pakistan | Letter to editors | Clinical practice | Obstructive Sleep Apnea | 1. Healthcare Consulting  2. Disease prediction  3. Improved patient outcomes and satisfaction | 1. Lack of human interaction and emotions  2. Ethics  3. Limited knowledge |
| Yue,2023[105] | Annals of biomedical engineering | China | Editorial | Clinical practice | NA | 1. Answer questions and offering explanations in a clear and accessible manner  2. Provide personalized tips for meal planning, suggest exercise routines, and offer guidance on recognizing and managing hypoglycemic or hyperglycemic episodes  3. Offer reminders for medication adherence, tracking blood glucose levels, or lifestyle modifications | 1. Ethics  2. Misinformation and Lack of reliability |
| Almazyad,2023[106] | Cureus | Saudi Arabia | Quantitative study | Clinical practice | Pediatrics | 1. Simplify work  2. Summary ability | 1. Biased  2. Misinformation and Lack of reliability |
| Gebrael,2023[107] | Cancers | USA | Experimental study | Clinical practice | Metastatic Prostate Cancer | 1. Enhance various aspects of patient care  2. Provide support clinical decision-making in emergency settings | 1. Lack of human interaction and emotions  2. Limited accuracy  3. Misinformation and Lack of reliability |
| Aditama,2023[108] | Journal of public health | Indonesia | Letter to editors | Health care research | Psychology | NA | 1. Epistemic justice |
| Changyu,2023[109] | Journal of medical Internet research | China | Point | Health care research | NA | NA | 1. Legal responsibility  2. Ethics  3. Algorithmic bias  4. Transparency |
| Ayers,2023[110] | JAMA network open | USA | Research letter | Clinical practice | NA | NA | NA |
| Seth,2023[111] | Aesthetic surgery journal | Australia | Qualitative research | Clinical practice | Plastic Surgery | 1. May lead to better medical decision making, knowledge dissemination, and satisfaction with end results | 1. Lack of human interaction and emotions  2. Misinformation and Lack of reliability |
| Campbell,2023[112] | Journal of Clinical Sleep Medicine | USA | Others | NA | NA | NA | NA |
| Holmes,2023[113] | Frontiers in oncology | USA | Experimental study | Health care research | Radiation, Oncology | NA | NA |
| Davis,2023[114] | Journal of Urology | USA | Experimental study | Clinical practice | Urology | 1. Provide patients with appropriate and readable urological information | 1. Misinformation and Lack of reliability  2. Limited accuracy |
| Cascella,2023[115] | Journal of medical systems | Italy | Brief report | Clinical practice | NA | 1. Support of the clinical practice  2. Scientific production  3. Reasoning about public health topics | 1. Others  2. Limited knowledge  3. Limited accuracy |
| Giannos,2023[116] | BMJ neurology open | UK | Experimental study | Health care research | NA | 1. Perform complex reasoning and effectively synthesize information from multiple sources | 1. Algorithmic bias |
| Koga,2023[117] | Brain pathology (Zurich, Switzerland) | USA | Cross-sectional study | Clinical practice | Neuropathology | NA | NA |
| Khanna,2023[118] | Journal francais d'ophtalmologie | France | Editorial | Clinical practice | Ophthalmology | 1. Rapid provision of disease knowledge | 1. Ethics  2. Academic dishonesty |
| Hurley,2023[119] | Arthroscopy : the journal of arthroscopic & related surgery : official publication of the Arthroscopy Association of North America and the International Arthroscopy Association | USA | Experimental study | Clinical practice | Surgical | NA | 1. Privacy  2. Biased  3. Transparency |
| Kusunose,2023[120] | Circulation journal : official journal of the Japanese Circulation Society | Japan | Opinion | Clinical practice | Hypertension | 1. Increase efficiency | 1. Limited accuracy  2. Misinformation and Lack of reliability |
| Yi,2023[121] | Aesthetic plastic surgery | Australia | Case study | Health care research | Surgical | 1. Provide relevant, Accurate information | 1. Misinformation and Lack of reliability |
| Henson,2023[122] | The American journal of gastroenterology | USA | Communication | NA | NA | NA | NA |
| Jiaming,2023[123] | International Journal of Interactive Multimedia and Artificial Intelligence | China | Report | Clinical practice | NA | NA | NA |
| Hamed,2023[124] | Cureus | Qatar | Experimental study | Health care research | Diabetic Ketoacidosis | 1. Integrate findings into a comprehensive guideline | 1. Misinformation and Lack of reliability |
| Li,2023[125] | International journal of surgery (London, England) | China | Editorial | Clinical practice | NA | 1. Increase efficiency | 1. Limited accuracy  2. Misinformation and Lack of reliability  3. Ethics  4. Transparency |
| Buzzaccarini,2023[126] | Human reproduction | Italy | Mixed study | Clinical practice | Reproductive Medicine | NA | 1. Limited accuracy |
| Kaarre,2023[127] | Knee surgery sports traumatology arthroscopy | USA | Experimental study | Clinical practice | Sports Medicine ,Orthopaedics | NA | NA |
| Chiesa-Estomba,2023[128] | European archives of oto-rhino-laryngology | Spain | Cross-sectional study | Clinical practice | Otolaryngology | NA | 1. Algorithmic bias |
| Seth,2023[129] | The Journal of hand surgery | Australia | Editorial | Clinical practice | NA | NA | 1. Academic dishonesty  2. Misinformation and Lack of reliability |
| Levin,2023[130] | Archives of gynecology and obstetrics | Israel | Review | Clinical practice | Obstetrics and Gynecology | 1. Increase efficiency | 1. Ethics |
| Dossantos,2023[131] | Cureus | USA | Experimental study | Health care research | Ophthalmology | NA | 1. Limited accuracy  2. Algorithmic bias  3. Ethics  4. Privacy  5. Misinformation and Lack of reliability |
| van de Ridder,2023[132] | Academic medicine | USA | Editorial | Medical education | NA | NA | 1. Overreliance |
| Hanyin,2023[133] | Drug safety | USA | Editorial | Clinical practice | Clinical Pharmacology | NA | 1. Limited knowledge |
| Tustumi,2023[134] | Abcd. Arquivos brasileiros de cirurgia digestiva (são paulo) | Brazil | Review | Clinical practice | NA | 1. Improve patient outcomes and increase the efficiency of healthcare delivery  2. Improve the accuracy of diagnoses | 1. Biased  2. Limited accuracy |
| Waisberg,2023[135] | Irish journal of medical science | Ireland | Editorial | NA | NA | 1. Help drive medical innovation  2. Aid with patient discharge notes  3. Summarize recent clinical trials  4. Provide information on ethical guidelines | 1. Algorithmic bias  2. Privacy |
| Gemingtian,2023[136] | Annals of biomedical engineering | China | Editorial | Clinical practice | Neurosurgeons | 1. Medical History Taking and Triage  2. Diagnostic Imaging  3. Medical Monitoring  4. Treatment Guidance  5. Prognosis Predicting  6. Scientific Research | NA |
| Thomas,2023[137] | Issues in Mental Health Nursing | USA | Editorial | Health care research | NA | 1. Medical History Taking and Triage  2. Diagnostic Imaging  3. Medical Monitoring  4. Treatment Guidance  5. Prognosis Predicting  6. Scientific Research | 1. Misinformation and Lack of reliability  2. Transparency |
| Gorelik,2023[138] | Gastrointestinal endoscopy | Israel | Experimental study | Clinical practice | NA | 1. Medical History Taking and Triage  2. Diagnostic Imaging  3. Medical Monitoring  4. Treatment Guidance  5. Prognosis Predicting  6. Scientific Research | 1. Limited accuracy |
| Lanzano,2023[139] | Aesthetic plastic surgery | Italy | Editorial | Clinical practice | NA | 1. Medical History Taking and Triage  2. Diagnostic Imaging  3. Medical Monitoring  4. Treatment Guidance  5. Prognosis Predicting  6. Scientific Research | 1. Ethics  2. Transparency |
| Kavian,2023[140] | American surgeon | USA | Opinion | Medical education | Surgical Treatments | 1. Medical History Taking and Triage  2. Diagnostic Imaging  3. Medical Monitoring  4. Treatment Guidance  5. Prognosis Predicting  6. Scientific Research | 1. Privacy |
| Kanter,2023[141] | Jama-journal of the american medical association | USA | Viewpoint | Health care research | Internal Medicine | NA | 1. Limited accuracy  2. Misinformation and Lack of reliability |
| Bhattacharyya,2023[142] | Cureus | USA | Observational study | Medical education | NA | NA | 1. Misinformation and Lack of reliability  2. Others |
| Alessandri Bonetti,2023[143] | Annals of biomedical engineering | Italy | Letter to editors | Medical education | NA | NA | NA |
| Hao,2023[144] | Studies in health technology and informatics | USA | Experimental study | Health care research | NA | 1. Provide contextually relevant and personalized responses | 1. Limited accuracy  2. Misinformation and Lack of reliability |
| Atallah,2023[145] | Techniques in coloproctology | USA | Editorial | Clinical practice | Surgical | 1. Save time  2. Generate discharge summary  3. Quickly integrate patient information  4. Decreasing provider burnout rates in the medical field | 1. Ethics  2. Misinformation and Lack of reliability |
| Yoshinari Junior,2023[146] | Revista da associacao médica brasileira | Brazil | Editorial | Medical education | NA | NA | 1. Limited accuracy  2. Privacy  3. Ethics |
| Calleja-Lopez,2023[147] | Archives of medical research | México | Letter to editors | Medical education | NA | 1. Personalized teaching  2. Reduction of teachers’ workload | 1. Limited accuracy  2. Others |
| Miao,2023[148] | Asian/Pacific Island nursing journal | USA | Editorial | Medical education | Nursing | NA | NA |
| Chow,2023[149] | Frontiers in artificial intelligence | Canada | Opinion | Medical education | Healthcare | 1. Reduce the workload of frontline health workers  2. Could help to alleviate shortages of healthcare workers | 1. Limited knowledge  2. Misinformation and Lack of reliability  3. Privacy  4. Limited accuracy  5. Ethics |
| Alanzi,2023[150] | Journal of Multidisciplinary Healthcare | Saudi Arabia | Quantitative study | Clinical practice | NA | 1. Time saving  2. Personalizing care | 1. Limited knowledge  2. Overreliance |
| Tiwari,2023[151] | Cureus | USA | Review | NA | Dentistry | 1. Original, methodical, and accurate  2. Helpful for training and for enhancing topic clarity  3. Time-effective; and encouraging writers' motivation by occasionally not following the directions correctly | 1. Legal responsibility  2. Biased |
| Eggmann,2023[152] | Journal of esthetic and restorative dentistry | USA | Review | Health care research | Dentistry | 1. Clinical decision support  2. Administrative work  3. Dental education | 1. Misinformation and Lack of reliability |
| Yue,2023[153] | Annals of biomedical engineering | China | Editorial | NA | NA | 1. Improve the accuracy and efficiency of diagnosis  2. Streamline administrative tasks  3. Increase the accessibility of healthcare services | NA |
| Aditama,2023[154] | Journal of public health | Indonesia | Letter to editors | Clinical practice | Psychology | NA | NA |
| Arachchige,2023[155] | European journal of nuclear medicine and molecular imaging | Italy | Letter to editors | NA | NA | 1. Make the research and publication process faster | 1. Limited knowledge  2. Lack of human interaction and emotions |
| Alberts,2023[156] | European journal of nuclear medicine and molecular imaging | Switzerland | Editorial | Medical education | Nuclear Medicine | 1. Proficient in basic science medical knowledge | NA |
| Abi-Rafeh,2023[157] | Aesthetic surgery journal | UK | Review | Clinical practice | Plastic Surgery | NA | NA |
| Bair,2023[158] | Academic medicine : journal of the Association of American Medical Colleges | California | Letter to editors | Medical education | NA | NA | NA |
| Abd-Alrazaq,2023[159] | JMIR medical education | USA | Viewpoint | Medical education | NA | 1. Revolutionize medical curriculum  2. Transform learning experiences for students | 1. Algorithmic bias  2. Overreliance  3. Plagiarism  4. misinformation  5. Inequity  6. Privacy  7. Copyright concerns |
| Thirunavukarasu,2023[160] | Journal of the royal society of medicine | UK | Editorial | Health care research | NA | NA | 1. Limited accuracy |
| Ali,2023[161] | Clinical and molecular hepatology | USA | Letter to editors | Clinical practice | Cirrhosis | 1. GPT-4 can accept a prompt that combines text and images  2. Better handling of long-form text  3. Reducing the chances of generating irrelevant or repetitive content  4. Helping patients and physicians make better-informed decisions. | NA |
| Ray,2023[162] | European journal of cardiovascular nursing | India | Editorial | Clinical practice | Nursing | NA | 1. Biased |
| Faraji,2023[163] | Journal of cancer research and clinical oncology | Iran | Editorial | Health care research | Oncology | 1. Provide the correct answer to screen questions  2. Select correct images with moderate accuracy to evaluate breast pain and cancer screening. | 1. Transparency |
| Adams,2023[164] | Journal of AHIMA | USA | Others | NA | NA | NA | NA |
| Haman,2023[165] | Annals of biomedical engineering | Czech | Editorial | Clinical practice | Mental Health Care | NA | NA |
| Corsello,2023[166] | Children-basel | Italy | Editorial | Health care research | Pediatrics | 1. Analyzing vast amounts of text data and generating new insights  2. Analyze speech patterns and language usage to identify children who may need further assessment and intervention | 1. Biased  2. Privacy  3. Overreliance  4. Ethics |
| Le,2023[167] | Cureus | USA | Cross-sectional study | Health care research | Internal Medicine, Oncology | 1.Increase efficiency | 1. Limited accuracy  2. Misinformation and Lack of reliability |
| Chakraborty,2023[168] | Annals of biomedical engineering | India | Editorial | Medical education | NA | NA | NA |
| Smith,2023[169] | International Journal of Social Psychiatry | Switzerland | Others | Medical education | Neuropathological | 1. Effective teaching tool | 1. Misinformation and Lack of reliability  2. Biased |
| Kleebayoon,2023[170] | International orthopedics | Cambodia | Editorial | Clinical practice | Orthopedics | NA | 1. Limited accuracy  2. Misinformation and Lack of reliability  3. Plagiarism  3. Biased |
| Temsah,2023[171] | Cureus | Saudi Arabia | Review | NA | NA | 1. Improve the efficiency and speed of programming | 1. Limited accuracy  2. Ethics |
| Hongyan,2023[172] | International journal of medical informatics | China | Experimental study | Medical education | NA | NA | 1. Ethics  2. Legal responsibility  3. Others |
| Morath,2023[173] | European journal of hospital pharmacy | Germany | Experimental study | Clinical practice | NA | NA | NA |
| Mihalache,2023[174] | Jama ophthalmology | UK | Report | Medical education | Ophthalmic | NA | NA |
| Fernández-Cisnal,2023[175] | Revista Española de Cardiología (English Edition) | Spain | Report | Clinical practice | Cardiovascular Disease | 1. Improve health outcomes and patient satisfaction. | 1. Ethics |
| Bhayana,2023[176] | Radiology | Canada | Original study | Medical education | Radiology | NA | 1. Others |
| Borchert,2023[177] | JMIR medical education | UK | Original paper | Medical education | NA | 1.Performed well in the examination | 1. Biased  2. Limited knowledge |
| Jansz,2023[178] | Cureus | USA | Report | Clinical practice | Amyopathic Dermatomyositis | NA | 1. Limited accuracy |
| Sng,2023[179] | Diabetes care | Singapore | Editorial | Clinical practice | NA | NA | 1. Limited accuracy |
| Kluger,2023[180] | J eur acad dermatol venereol | Finland | Editorial | Clinical practice | Dermatology | NA | 1. Ethics  2. Plagiarism |
| Wang,2023[181] | Annals of biomedical engineering | USA | Editorial | NA | NA | 1. Provide efficient and accurate diagnostic advice | NA |
| Elkassem,2023[182] | American Journal of Roentgenology | USA | Review | Clinical practice | Radiology | 1. Increased efficiency and user friendliness.  2. Summarizing reports  3. Ability to generate layman's reports for different levels of education and available in more than 40 different languages | 1. Overreliance  2. Privacy  3. Ethics  4. Lack of human interaction and emotions |
| Tsang,2023[183] | Journal of medical education and curricular development | Canada | Opinion | Medical education | NA | 1. Time savings  2. Tssist students in exam preparation and to guide their studying  3. Presenting the information in a concise, practical manner for ease of understanding | 1. Ethics  2. Privacy  3. Academic dishonesty  4. Limited knowledge |
| Mohammed,2023[184] | Journal of racial and ethnic health disparities | Kaduna, Nigeria | Cross-sectional study | Medical education | Clinical Pharmacology | NA | 1. Lack of human interaction and emotions  2. Privacy  3. Biased |
| Nov,2023[185] | JMIR medical education | USA | Survey study | Clinical practice | NA | NA | 1. Misinformation and Lack of reliability  2. Biased |
| Cocci,2023[186] | Prostate cancer and prostatic diseases | Italy | Experimental study | Clinical practice | Urology | 1. Improve health outcomes and patient satisfaction | 1. Limited accuracy  2. Misinformation and Lack of reliability |
| Zhavoronkov,2022[187] | Oncoscience | China | Original research | Clinical practice | Oncology | 1. Treatment options | NA |
| Seth,2023[188] | Ann surg oncol | Australia | Editorial | Health care research | Surgical | 1. Provide accurate and consistent information | 1. Others |
| Elkassem,2023[189] | American Journal of Roentgenology | USA | Letter to editors | NA | NA | NA | NA |
| Calleja-Lopez,2023[190] | Archives of medical research | Mexico | Letter to editors | Medical education | Obstructive Sleep Apnea | 1. Provide appropriate answers | NA |
| Wagner,2023[191] | Canadian Association of Radiologists Journal | Canada | Editorial | NA | Radiology | NA | NA |
| Kim,2023[192] | Journal of pediatric urology | Canada | Editorial | Health care research | NA | NA | NA |
| Qiao,2023[193] | Journal of the American Society of Nephrology : JASN | USA | Perspective | Medical education | NA | 1. Assisting medical education | 1. Misinformation and Lack of reliability  2. Biased |
| Zhiqiang,2023[194] | Annals of biomedical engineering | Japan | Editorial | Clinical practice | NA | NA | 1. Limited accuracy  2. Misinformation and Lack of reliability |
| Hasnain,2023[195] | Annals of biomedical engineering | Pakistan | Editorial | Medical education | Chronic Obstructive Pulmonary Disease | 1. Bring modifications in lifestyle and provide emotional support | 1. Others |
| Xiao,2023[196] | Journal of pediatric surgery | USA | Review | NA | Pediatric Surgery | NA | 1. Misinformation and Lack of reliability  2. Lack of consistency |
| Ali,2023[197] | Studies in health technology and informatics | Qatar | Others | Medical education | NA | 1. Swift data processing  2. Accessibility for an affordable cost  3. Personal health consultation and virtual health assistance  4. Help diagnose, write medical notes, and transform medical education | 1. Others |
| Wenbo,2023[198] | Annals of biomedical engineering | China | Editorial | Clinical practice | Neurosurgery | 1. Enhancing design automation  2. Saves time and resources  3. Quality Assurance  4. Integration of Expert Knowledge  5. Collaboration and Brainstorming  6. Training and Documentation  7. Process Optimization  8. Material Selection  9. Supply Chain Management  10. Continuous Improvement  11. enhanced patient care and improved surgical outcomes, ultimately contributing to increased patient satisfaction  12. By providing a virtual environment for practice, planning, and evaluation, these simulations contribute to more informed decision-making, heightened surgical accuracy, and ultimately, enhanced patient outcomes  13. Superior patient outcomes and elevated overall surgical success rate  14. Enhanced Patient Communication and collaboration and Knowledge Sharing  15. Training and Education  16. Balancing Innovation and Ethics in AI‑Integrated Neurosurgery | 1. Ethics |
| Castonguay,2023[199] | Nurse education today | Canada | Others | Medical education | Nursing | 1. Create lesson plans and course materials  2. Improving writing quality  3. Aid data analysis and interpretation | 1. Limited knowledge  2. Privacy  3. Biased  4. Misinformation and Lack of reliability |
| Lecler,2023[200] | Diagn interv imaging | France | Cross-sectional study | Clinical practice | Radiology | 1. Help learning  2. Increase efficiency  3. Academic writing | 1. Limited accuracy  2. Misinformation and Lack of reliability  3. Ethics |
| Lourenco,2023[201] | Radiology | USA | Editorial | Medical education | Radiology | NA | NA |
| Benichou,2023[202] | Journal of stomatology, oral and maxillofacial surgery | France | Short communication | Health care research | NA | NA | 1. Others |
| Biswas,2023[203] | Annals of biomedical engineering | USA | Letter to editors | Clinical practice | Public Health | 1. Providing information on public health issues, such as infectious diseases, chronic diseases, and environmental health hazards  2. Answering questions about health promotion and disease prevention strategies  3. Explaining the role of community health workers and health educators  4. Discussing the impact of social and environmental factors on community health  5. Providing information about community health programs and services | 1. Limited accuracy  2. Date bias  3. Limited knowledge |
| Biswas,2023[204] | Pediatr radiol | Germany | Commentary | Clinical practice | Radiology | 1. Provide diagnosis and treatment opinions  2. Provide information on radiation safety guidelines and regulations | 1. Biased  2. Limited accuracy  3. Legal responsibility |
| Datt,2023[205] | Annals of biomedical engineering | India | Editorial | Health care research | NA | 1. Lelp medical professionals or researchers in clinical contexts as a virtual assistant | 1. Privacy  2. Date bias  3. Ethics  4. Limited accuracy |
| Alfertshofer,2023[206] | Annals of biomedical engineering | Germany | Letter to editors | Medical education | NA | NA | NA |
| Gupta,2023[207] | Academic emergency medicine | USA | Experimental study | Clinical practice | Emergency | 1. Assist in clinical decision-making | NA |
| Buzzaccarini,2023[208] | Aesthetic plastic surgery | Italy | Letter to editors | Clinical practice | Aesthetic Medicine | 1.Personalize treatment plans  2. Improving patient satisfaction and the overall success of aesthetic procedures  3. Help reduce the workload of healthcare providers, allowing them to focus on more complex cases and improve the overall quality of care  4. By staying up to date with the latest research and best practices in aesthetic medicine | 1. Privacy  2. Biased  3. Algorithmic bias |
| Minssen,2023[209] | Jama-journal of the american medical association | USA | Opinion | NA | NA | NA | 1. Ethics |
| Chen,2023[210] | Journal of the American Academy of Dermatology | USA | Others | Clinical practice | Dermatology | NA | 1. Algorithmic bias |
| Mesko,2023[211] | Journal of medical internet research | Hungary | Opinion | NA | NA | NA | NA |
| Bradshaw,2023[212] | Annals of emergency medicine | USA | Letter to editors | Clinical practice | Emergency Medicine | 1. Improve the efficiency and accuracy of patient care  2. Quickly extract and analyze patient information  3. Quickly and accurately generate personalized discharge summaries for their patients  4. Reduce the burden of data entry and increase the accuracy of patient information | NA |
| Zhimin,2023[213] | International journal of surgery (London, England) | China | Editorial | Health care research | NA | 1. Aiding early intervention and adverse event prevention  2. Enables efficient real-time clinical decision support and documentation  3. Assist medical students as a self-learning tool  4. Empowering patients to understand their conditions  5. Enhances the efficiency of medical research | 1. Transparency  2. Privacy |
| Ferreira,2023[214] | Journal of the American Academy of Dermatology | USA | Editorial | Clinical practice | Dermatology | NA | 1. Ethics  2. Biased  3. Privacy |
| Heng,2023[215] | Postgraduate medical journal | Singapore | Others | Medical education | NA | NA | NA |
| Ahmed,2023[216] | Annals of biomedical engineering | Iraq | Letter to editors | Medical education | Nursing | 1. Promote patient care and education | 1. Privacy |
| Ahn,2023[217] | Korean journal of medical education | Korea | Others | Medical education | NA | 1. Retrieve information  2. Generate essays and articles  3. Generate human-like speech  4. Reason in a form of chain of thought | 1. Misinformation and Lack of reliability |
| Koo,2023[218] | Radiology | China | Editorial | Medical education | NA | 1. Medical writing  2. Increase efficiency  3. Language translation | 1. Plagiarism  2. Ethics |
| Wang,2023[219] | Medical teacher | USA | Editorial | Medical education | NA | NA | NA |
| Baumgartner,2023[220] | Clinical and Translational Medicine | Austria | Commentary | NA | NA | NA | 1. Algorithmic bias  2. Ethics  3. Privacy  4. Misinformation and Lack of reliability |
| Baumgartner,2023[221] | Clinical and Translational Medicine | Austria | Commentary | Clinical practice | Translational Medicine | 1. Access to up-to-date information  2. Improved patient engagement  3. Reduced workload for healthcare providers | 1. Ethics  2. Privacy  3. Misinformation, and Lack of reliability |
| Jing,2023[222] | Annals of biomedical engineering | Malaysia | Editorial | Clinical practice | NA | 1. Enhance Education and Learning  2. Facilitate Communication and Social Skills  3. Support Daily Living Skills  4. Promote Emotional Well-Being Emotional | NA |
| Koga,2023[223] | Annals of biomedical engineering | USA | Editorial | Medical education | NA | 1. Help learning | 1. Limited knowledge |
| Kunming,2023[224] | Annals of biomedical engineering | China | Editorial | Clinical practice | Joint Arthroplasty | NA | 1. Limited accuracy |
| Chervenak,2023[225] | Fertility and sterility | USA | Others | Clinical practice | NA | 1. Helping increase access to understanding and managing fertility | 1. Misinformation and Lack of reliability |
| Arora,2023[226] | Lancet | UK | Correspondence | NA | NA | 1. Summarize the patient's length of stay Compose a discharge letter | 1. Privacy  2. Biases |
| Mohammad,2023[227] | Studies in health technology and informatics | Qatar | Review | Medical education | NA | 1. Offering personalized, interactive, and readily available learning experiences  2. Improve patient outcomes and advance the medical field | 1. Lack of human interaction and emotions |
| Lee,2023[228] | Anatomical sciences education | Korea | Opinion | Medical education | NA | 1. Help learning  2. Increase efficiency  3. Improved accuracy | 1. Ethics  2. Limited accuracy  3. Misinformation and Lack of reliability  4. Plagiarism  5. Academic dishonesty |
| Mardikaningsih,2023[229] | Journal of public health | Indonesia | Editorial | Health care research | Mental Health | NA | 1. Lack of human interaction and emotions  2. Misinformation and Lack of reliability  3. Limited accuracy |
| Ufuk,2023[230] | Radiology | Turkey | Editorial | Health care research | NA | 1. Review manuscripts for grammar, spelling, and punctuation errors | 1. Privacy  2. Algorithmic bias  3. Ethics |
| Sevgi,2023[231] | Neurosurgical review | Turkey | Preliminary study | Medical education | Neuropathological | 1. Help students and residents develop the necessary academic skills and theoretical knowledge | 1. Limited knowledge |
| Cohen,2023[232] | Headache | USA | Opinion | Clinical practice | Headache Medicine | NA | NA |
| Ashraf,2023[233] | Annals of biomedical engineering | Pakistan | Letter to editors | Health care research | NA | 1. Clarify concepts, theories | 1. Misinformation and Lack of reliability  2. Lack of human interaction and emotions |
| Breeding,2023[234] | American surgeon | USA | Original research | Medical education | NA | NA | NA |
| Kleinig,2023[235] | Medical journal of australia | SA | Editorial | Medical education | NA | NA | NA |
| McLean,2023[236] | Annals of biomedical engineering | Germany | Editorial | Clinical practice | Spinal Surgery | NA | 1. Algorithmic bias |
| Nazario-Johnson,2023[237] | Journal of the American College of Radiology | USA | Experimental study | Clinical practice | Neuroimaging | 1. Rapidly and effectively analyze large quantities of patient data  2. The rapid access to information that LLMs can provide | 1. Privacy |
| Siru,2023[238] | Journal of the american medical informatics association | USA | Experimental study | Clinical practice | NA | 1. Identify potential improvements to alert logic and support their implementation,  2. Assist experts in formulating their own suggestions for CDS improvement | 1. Limited knowledge |
| Arun Babu,2023[239] | Eur j obstet gynecol reprod biol | India | Letter to editors | Health care research | NA | NA | 1. Ethics  2. Bias |
| Scerri,2023[240] | Journal of clinical nursing | Malta | Editorial | Clinical practice | Nursing | 1. Reduce repetitive writing and administrative work  2. Providing conversation  3. Generate instructions and recommendations  4. Simplified instructions | 1. Misinformation and Lack of reliability  2. Biased  3. Privacy |
| Johnson,2023[241] | JNCI cancer spectrum | USA | Experimental study | Health care research | Oncology | NA | 1. Misinformation and Lack of reliability  2. Biased  3. Privacy |
| Jialin,2023[242] | Journal of medical Internet research | China | Opinion | Clinical practice | NA | 1. Proven effective in generating patient clinical letters, radiology reports, medical notes, and discharge summaries  2. Improving efficiency and accuracy for health care providers | 1. Misinformation and Lack of reliability  2. Biased  3. Privacy |
| Gupta,2023[243] | J plast reconstr aesthet surg | USA | Editorial | Health care research | Plastic Surgery | 1. Assist in clinical decision-making | 1. Misinformation and Lack of reliability  2. Biased  3. Privacy |
| Cox,2023[244] | Aesthetic surgery journal | Australia | Editorial | Clinical practice | Plastic and Reconstructive Surgery | 1. Provide information with sufficient depth | 1. Misinformation and Lack of reliability  2. Biased  3. Privacy |
| Montastruc,2023[245] | European journal of clinical pharmacology | France | Cross-sectional study | Clinical practice | Clinical Pharmacology | NA | 1. Misinformation and Lack of reliability  2. Biased  3. Privacy |
| Abdulai,2023[246] | Nursing inquiry | Canada | Commentary | Medical education | Nursing | NA | NA |
| Yongbin,2023[247] | Annals of biomedical engineering | USA | Editorial | Clinical practice | Spinal Surgeons | 1. Bring modifications in lifestyle  2. Provide emotional support | 1. Misinformation and Lack of reliability  2. Limited accuracy |

NA: Key characteristics not mentioned in the study

1. Kim, H.-Y., *A Case Report on Ground-Level Alternobaric Vertigo Due to Eustachian Tube Dysfunction With the Assistance of Conversational Generative Pre-trained Transformer (ChatGPT).* Cureus, 2023. **15**(3): p. e36830-e36830.

2. Galido, P.V., et al., *A Case Study Demonstrating Applications of ChatGPT in the Clinical Management of Treatment-Resistant Schizophrenia.* Cureus, 2023. **15**(4): p. e38166-e38166.

3. Raxwal, B., P. Baisla, and J. Nath, *A Collaborative Case Report Utilizing ChatGPT AI Technology of Traumatic Right Coronary Artery Dissection Resulting in Inferior Wall ST-Elevation Myocardial Infarction.* Cureus, 2023. **15**(3): p. e35894-e35894.

4. Ray, P.P., *A critical analysis of use of ChatGPT in orthopaedics.* International Orthopaedics, 2023. **47**(10): p. 2617-2618.

5. Sharma, S., et al., *A Critical Review of ChatGPT as a Potential Substitute for Diabetes Educators.* Cureus, 2023. **15**(5): p. e38380-e38380.

6. Yunhan, H., et al., *A digital ally: The potential roles of ChatGPT in mental health services.* Asian journal of psychiatry, 2023. **88**: p. 103726-103726.

7. Baumgartner, C. and D. Baumgartner, *A regulatory challenge for natural language processing (NLP)-based tools such as ChatGPT to be legally used for healthcare decisions. Where are we now?* Clinical and translational medicine, 2023. **13**(8): p. e1362-e1362.

8. Bosbach, W.A., et al., *Ability of ChatGPT to generate competent radiology reports for distal radius fracture by use of RSNA template items and integrated AO classifier.* Current problems in diagnostic radiology, 2023. **53**(1): p. 102-110.

9. Cao, J.J., et al., *Accuracy of Information Provided by ChatGPT Regarding Liver Cancer Surveillance and Diagnosis.* American journal of roentgenology, 2023. **221**(4): p. 556-559.

10. Siqi, L., G. Zheng, and Z. Xuehui, *Advancing the Production of Clinical Medical Devices Through ChatGPT.* ANNALS OF BIOMEDICAL ENGINEERING, 2023. **52**(3): p. 441–445.

11. Au Yeung, J., et al., *AI chatbots not yet ready for clinical use.* Frontiers in digital health, 2023. **5**: p. 1161098-1161098.

12. Anderson, N., et al., *AI did not write this manuscript, or did it? Can we trick the AI text detector into generated texts? The potential future of ChatGPT and AI in Sports & Exercise Medicine manuscript generation.* BMJ open sport & exercise medicine, 2023. **9**(1): p. e001568-e001568.

13. Hamdoun, S., et al., *AI-Based and Digital Mental Health Apps: Balancing Need and Risk.* IEEE Technology and Society Magazine, 2023. **42**(1): p. 25-36.

14. Lewandowski, M., et al., *An original study of ChatGPT-3.5 and ChatGPT-4 Dermatological Knowledge Level based on the Dermatology Specialty Certificate Examinations.* Clinical and experimental dermatology, 2023.

15. Agarwal, M., P. Sharma, and A. Goswami, *Analysing the Applicability of ChatGPT, Bard, and Bing to Generate Reasoning-Based Multiple-Choice Questions in Medical Physiology.* Cureus, 2023. **15**(6): p. e40977-e40977.

16. Gupta, R., et al., *Application of ChatGPT in Cosmetic Plastic Surgery: Ally or Antagonist?* Aesthetic Surgery Journal, 2023. **43**(7): p. NP587-NP590.

17. Schukow, C., et al., *Application of ChatGPT in Routine Diagnostic Pathology: Promises, Pitfalls, and Potential Future Directions.* Advances in anatomic pathology, 2023. **31**(1): p. 15–21.

18. Morita, P.P., et al., *Applying ChatGPT in public health: a SWOT and PESTLE analysis.* Frontiers in Public Health, 2023. **11**: p. 1225861.

19. Aubignat, M. and E. Diab, *Artificial intelligence and ChatGPT between worst enemy and best friend: The two faces of a revolution and its impact on science and medical schools.* REVUE NEUROLOGIQUE, 2023. **179**(6): p. 520-522.

20. Fayed, A.M., et al., *Artificial intelligence and ChatGPT in Orthopaedics and sports medicine.* Journal of experimental orthopaedics, 2023. **10**(1): p. 74-74.

21. Valentín-Bravo, F.J., et al., *Artificial Intelligence and new language models in Ophthalmology: Complications of the use of silicone oil in vitreoretinal surgery.* Archivos de la Sociedad Española de Oftalmología (English Edition), 2023. **98**(5): p. 298-303.

22. Deiana, G., et al., *Artificial Intelligence and Public Health: Evaluating ChatGPT Responses to Vaccination Myths and Misconceptions.* VACCINES, 2023. **11**(7): p. 1217.

23. Dahmen, J., et al., *Artificial intelligence bot ChatGPT in medical research: the potential game changer as a double-edged sword.* KNEE SURGERY SPORTS TRAUMATOLOGY ARTHROSCOPY, 2023. **31**(4): p. 1187-1189.

24. Yanqiu, L., et al., *Artificial Intelligence in Intensive Care Medicine: Toward a ChatGPT/GPT-4 Way.* ANNALS OF BIOMEDICAL ENGINEERING, 2023. **51**(9): p. 1898-1903.

25. McLean, A.L., *Artificial Intelligence in Surgical Documentation: A Critical Review of the Role of Large Language Models.* ANNALS OF BIOMEDICAL ENGINEERING, 2023. **51**(12): p. 2641–2642.

26. Kao, H.-J., et al., *Assessing ChatGPT's capacity for clinical decision support in pediatrics: A comparative study with pediatricians using KIDMAP of Rasch analysis.* Medicine, 2023. **102**(25): p. e34068-e34068.

27. Shay, D., et al., *Assessment of ChatGPT success with specialty medical knowledge using anaesthesiology board examination practice questions.* British journal of anaesthesia, 2023. **131**(2): p. e31-e34.

28. Morreel, S., D. Mathysen, and V. Verhoeven, *Aye, AI! ChatGPT passes multiple-choice family medicine exam.* MEDICAL TEACHER, 2023. **45**(6): p. 665–666.

29. Yuki, K. and S. Ryuhei, *Benefits, Limits, and Risks of GPT-4 as an Al Chatbot for Medicine.* New England Journal of Medicine, 2023. **388**(13): p. 1233–1239.

30. Najafali, D., et al., *Can Chatbots Assist With Grant Writing in Plastic Surgery? Utilizing ChatGPT to Start an R01 Grant.* Aesthetic Surgery Journal, 2023. **43**(8): p. NP663-NP665.

31. Coskun, B., et al., *Can ChatGPT, an Artificial Intelligence Language Model, Provide Accurate and High-quality Patient Information on Prostate Cancer?* Urology, 2023. **180**: p. 35-58.

32. Nune, A., et al., *Chat generative pre-trained transformer (ChatGPT): potential implications for rheumatology practice.* Rheumatol Int, 2023. **43**(7): p. 1379-1380.

33. Colletti, P.M., *Chatbots in Medical Research: Advantages and Limitations of AI-Enabled Writing With a Focus on ChatGPT as an Author: Reply.* Clinical nuclear medicine, 2023. **48**(9): p. 839-839.

34. Howard, A., W. Hope, and A. Gerada, *ChatGPT and antimicrobial advice: the end of the consulting infection doctor ?* LANCET INFECTIOUS DISEASES, 2023. **23**(4): p. 405-405.

35. Ferdush, J., M. Begum, and S.T. Hossain, *ChatGPT and Clinical Decision Support: Scope, Application, and Limitations.* ANNALS OF BIOMEDICAL ENGINEERING, 2023. **52**(5): p. 1119–1124.

36. Jeha, G.M., et al., *ChatGPT and Generative Artificial Intelligence in Mohs Surgery: A New Frontier of Innovation.* The Journal of investigative dermatology, 2023. **143**(11): p. 2105–2107.

37. Kim, J.K., et al., *ChatGPT and large language model (LLM) chatbots: The current state of acceptability and a proposal for guidelines on utilization in academic medicine.* Journal of pediatric urology, 2023. **19**(5): p. 598–604.

38. Temsah, M.-H., et al., *ChatGPT and the Future of Digital Health: A Study on Healthcare Workers' Perceptions and Expectations.* HEALTHCARE, 2023. **11**(13): p. 1812.

39. Songwei, F. and S. Yang, *ChatGPT and the Future of Medical Education.* Academic medicine : journal of the Association of American Medical Colleges, 2023. **98**(8): p. 867-868.

40. Weng, T.-L., et al., *ChatGPT failed Taiwan's Family Medicine Board Exam.* Journal of the Chinese Medical Association : JCMA, 2023. **86**(8): p. 762-766.

41. Fatani, B., *ChatGPT for Future Medical and Dental Research.* Cureus, 2023. **15**(4): p. e37285-e37285.

42. Jin, J.Q. and A.S. Dobry, *ChatGPT for healthcare providers and patients: Practical implications within dermatology.* Journal of the American Academy of Dermatology, 2023. **89**(4): p. 870–871.

43. Reis, L.O., *ChatGPT for medical applications and urological science.* International braz j urol, 2023. **49**(5): p. 652-656.

44. Hanyao, H., et al., *ChatGPT for shaping the future of dentistry: the potential of multi-modal large language model.* INTERNATIONAL JOURNAL OF ORAL SCIENCE, 2023. **15**(1): p. 29.

45. Oh, N., G.-S. Choi, and W.Y. Lee, *ChatGPT goes to the operating room: evaluating GPT-4 performance and its potential in surgical education and training in the era of large language models.* ANNALS OF SURGICAL TREATMENT AND RESEARCH, 2023. **104**(5): p. 269-273.

46. Wenbo, L., Z. Yinxu, and C. Fengmin, *ChatGPT in Colorectal Surgery: A Promising Tool or a Passing Fad?* ANNALS OF BIOMEDICAL ENGINEERING, 2023. **51**(9): p. 1892-1897.

47. Alhaidry, H.M., et al., *ChatGPT in Dentistry: A Comprehensive Review.* Cureus, 2023. **15**(4): p. e38317-e38317.

48. Haemmerli, J., et al., *ChatGPT in glioma adjuvant therapy decision making: ready to assume the role of a doctor in the tumour board?* BMJ health & care informatics, 2023. **30**(1): p. e100775.

49. Kleebayoon, A. and V. Wiwanitkit, *ChatGPT in medical practice, education and research: malpractice and plagiarism.* Clinical medicine (London, England), 2023. **23**(3): p. 280-280.

50. Darzidehkalani, E., *ChatGPT in Medical Publications.* Radiology, 2023. **307**(5): p. e231188-e231188.

51. Dave, T., S.A. Athaluri, and S. Singh, *ChatGPT in medicine: an overview of its applications, advantages, limitations, future prospects, and ethical considerations.* Frontiers in artificial intelligence, 2023. **6**: p. 1169595-1169595.

52. Parsa, A. and M.H. Ebrahimzadeh, *ChatGPT in Medicine; a Disruptive Innovation or Just One Step Forward?* The archives of bone and joint surgery, 2023. **11**(4): p. 225-226.

53. Laudicella, R., et al., *ChatGPT in nuclear medicine and radiology: lights and shadows in the AI bionetwork.* CLINICAL AND TRANSLATIONAL IMAGING, 2023. **11**: p. 407–411.

54. Arachchige, A.S.P.M.S., *ChatGPT in nuclear medicine and radiology: reply to Laudicella et al.* CLINICAL AND TRANSLATIONAL IMAGING, 2023. **11**: p. 505–506.

55. Ray, P.P. and P. Majumder, *ChatGPT in Radiology: A Deeper Look Into its Limitations and Potential Pathways for Improvement.* Canadian Association of Radiologists Journal, 2023.

56. Bhattacharya, K., et al., *ChatGPT in Surgical Practice-a New Kid on the Block.* INDIAN JOURNAL OF SURGERY, 2023. **85**: p. 1346–1349.

57. Choudhary, O.P. and Priyanka, *ChatGPT in travel medicine: A friend or foe?* Travel medicine and infectious disease, 2023. **54**: p. 102615-102615.

58. Humar, P., et al., *ChatGPT Is Equivalent to First-Year Plastic Surgery Residents: Evaluation of ChatGPT on the Plastic Surgery In-service Examination.* AESTHETIC SURGERY JOURNAL, 2023. **43**(12): p. NP1085–NP1089.

59. Meo, S.A., et al., *ChatGPT Knowledge Evaluation in Basic and Clinical Medical Sciences: Multiple Choice Question Examination-Based Performance.* HEALTHCARE, 2023. **11**(14): p. 2046.

60. Li, S.W., et al., *ChatGPT outscored human candidates in a virtual objective structured clinical examination in obstetrics and gynecology.* American journal of obstetrics and gynecology, 2023. **229**(2): p. 172.e1-172.e12.

61. Mbakwe, A.B., et al., *ChatGPT passing USMLE shines a spotlight on the flaws of medical education.* PLOS digital health, 2023. **2**(2): p. e0000205-e0000205.

62. Oztermeli, A.D. and A. Oztermeli, *ChatGPT performance in the medical specialty exam: An observational study.* Medicine, 2023. **102**(32): p. e34673-e34673.

63. Deebel, N.A. and R. Terlecki, *ChatGPT Performance on the American Urological Association Self-assessment Study Program and the Potential Influence of Artificial Intelligence in Urologic Training.* Urology, 2023. **177**: p. 29-33.

64. Khan, R.A., et al., *ChatGPT- Reshaping medical education and clinical management.* PAKISTAN JOURNAL OF MEDICAL SCIENCES, 2023. **39**(2): p. 605-607.

65. Skalidis, I., et al., *ChatGPT takes on the European Exam in Core Cardiology: an artificial intelligence success story?* European heart journal. Digital health, 2023. **4**(3): p. 279-281.

66. O’Hern, K., E. Yang, and N.Y. Vidal, *ChatGPT underperforms in triaging appropriate use of Mohs surgery for cutaneous neoplasms.* JAAD International, 2023. **12**: p. 168-170.

67. Ventriglio, A. and F. Ricci, *ChatGPT use in teaching social psychiatry.* International Journal of Social Psychiatry, 2023: p. 207640231178481.

68. Hristidis, V., et al., *ChatGPT vs Google for Queries Related to Dementia and Other Cognitive Decline: Comparison of Results.* Journal of medical Internet research, 2023. **25**: p. e48966-e48966.

69. Kleebayoon, A. and V. Wiwanitkit, *ChatGPT, authorship, and medical publishing.* ACR open rheumatology, 2023. **5**(8): p. 419.

70. Kleebayoon, A. and V. Wiwanitkit, *ChatGPT/GPT-4 and Spinal Surgeons.* ANNALS OF BIOMEDICAL ENGINEERING, 2023. **51**(8): p. 1657-1657.

71. Kunming, C., W. Haiyang, and L. Cheng, *ChatGPT/GPT-4: enabling a new era of surgical oncology.* International Journal of Surgery, 2023. **109**(8): p. 2549-2550.

72. Dahdah, J.E., et al., *ChatGPT: A Valuable Tool for Emergency Medical Assistance.* ANNALS OF BIOMEDICAL ENGINEERING, 2023. **82**(3): p. 411–413.

73. Ebrahimi, B., et al., *ChatGPT: Can a Natural Language Processing Tool Be Trusted for Radiation Oncology Use?* International Journal of Radiation Oncology*Biology*Physics, 2023. **116**(5): p. 977-983.

74. Moons, P. and L. Van Bulck, *ChatGPT: can artificial intelligence language models be of value for cardiovascular nurses and allied health professionals.* EUROPEAN JOURNAL OF CARDIOVASCULAR NURSING, 2023. **22**(7): p. e55–e59.

75. Imran, N., A. Hashmi, and A. Imran, *Chat-GPT: Opportunities and Challenges in Child Mental Healthcare.* Pakistan journal of medical sciences, 2023. **39**(4): p. 1191-1193.

76. Gandhi Periaysamy, A., et al., *ChatGPT: roles and boundaries of the new artificial intelligence tool in medical education and health research - correspondence.* Annals of medicine and surgery (2012), 2023. **85**(4): p. 1317-1318.

77. Armitage, R.C., *ChatGPT: the threats to medical education.* POSTGRADUATE MEDICAL JOURNAL, 2023. **99**(1176): p. 1130–113.

78. Gerli, A.A.G., et al., *ChatGPT: unlocking the potential of Artifical Intelligence in COVID-19 monitoring and prediction.* Panminerva Med, 2023. **65**(4): p. 461–466.

79. Xiaoni, L., et al., *ChatGPT: when the artificial intelligence meets standardized patients in clinical training.* Journal of Translational Medicine, 2023. **21**(1): p. 447.

80. Temsah, M.-H., et al., *ChatGPT-4 and the Global Burden of Disease Study: Advancing Personalized Healthcare Through Artificial Intelligence in Clinical and Translational Medicine.* Cureus, 2023. **15**(5): p. e39384-e39384.

81. Barash, Y., et al., *ChatGPT-4 Assistance in Optimizing Emergency Department Radiology Referrals and Imaging Selection.* Journal of the American College of Radiology, 2023. **20**(10): p. 998–100.

82. Castro, H., *ChatGPT-4: dermatology aid in the emergency room.* Dermatologie (Heidelb), 2023. **74**(8): p. 633-634.

83. Ali, K., et al., *ChatGPT-A double-edged sword for healthcare education? Implications for assessments of dental students.* European journal of dental education : official journal of the Association for Dental Education in Europe, 2023. **28**(1): p. 206–211.

84. Uprety, D., D. Zhu, and H. West, *ChatGPT—A promising generative AI tool and its implications for cancer care.* Cancer, 2023. **129**(15): p. 2284-2289.

85. Lakshman, K., *ChatGPT-Its Role in Medical Writing.* INDIAN JOURNAL OF SURGERY, 2023. **85**: p. 1519–1520.

86. Golan, R., et al., *ChatGPT's Ability to Assess Quality and Readability of Online Medical Information: Evidence From a Cross-Sectional Study.* Cureus, 2023. **15**(7): p. e42214-e42214.

87. Jing, Y., *ChatGPTs' Journey in Medical Revolution: A Potential Panacea or a Hidden Pathogen?* ANNALS OF BIOMEDICAL ENGINEERING, 2023. **51**(11): p. 2356–2358.

88. Santana, L.A.d.M., et al., *Combining ChatGPT and machine learning: A viable alternative for discussion in oral medicine.* Oral Diseases, 2023.

89. Mungmunpuntipantip, R. and V. Wiwanitkit, *Comment on "ChatGPT failed Taiwan's Family Medicine Board Exam".* Journal of the Chinese Medical Association, 2023. **86**(8): p. 775-775.

90. Vasilchenko, K. and E. Chumakov, *Comment on ‘Old dog, new tricks? Exploring the potential functionalities of ChatGPT in supporting educational methods in social psychiatry’.* International Journal of Social Psychiatry, 2023: p. 207640231178464.

91. Ayers, J.W., et al., *Comparing Physician and Artificial Intelligence Chatbot Responses to Patient Questions Posted to a Public Social Media Forum.* JAMA INTERNAL MEDICINE, 2023. **183**(6): p. 589-596.

92. Ayoub, N.F., et al., *Comparison Between ChatGPT and Google Search as Sources of Postoperative Patient Instructions.* JAMA OTOLARYNGOLOGY-HEAD & NECK SURGERY, 2023. **149**(6): p. 556-558.

93. Nayak, A., et al., *Comparison of History of Present Illness Summaries Generated by a Chatbot and Senior Internal Medicine Residents.* JAMA INTERNAL MEDICINE, 2023. **183**(9): p. 1026–1027.

94. Alser, M. and E. Waisberg, *Concerns with the Usage of ChatGPT in Academia and Medicine: A Viewpoint.* American Journal of Medicine Open, 2023. **9**.

95. Kleebayoon, A. and V. Wiwanitkit, *Correspondence on "ChatGPT in nuclear medicine education" by Currie and Barry.* Journal of neurointerventional surgery, 2023. **16**(2): p. 218.

96. Yeo, Y.H., J.S. Samaan, and W.H. Ng, *Correspondence on Letter 2 regarding "Assessing the performance of ChatGPT in answering questions regarding cirrhosis and hepatocellular carcinoma".* Clinical and molecular hepatology, 2023. **29**(3): p. 823-824.

97. Woodnutt, S., et al., *Could artificial intelligence write mental health nursing care plans?* Journal of Psychiatric and Mental Health Nursing, 2023. **31**(1): p. 79-86.

98. Li, H., et al., *Decoding radiology reports: Potential application of OpenAI ChatGPT to enhance patient understanding of diagnostic reports.* Clin Imaging, 2023. **101**: p. 137-141.

99. Kulkarni, S.V., S. Sinha, and R.D. Narasimhan, *Digital Technology in Clinical Medicine: From Calculators to ChatGPT.* The Journal of the Association of Physicians of India, 2023. **71**(5): p. 11-12.

100. Teperikidis, E., et al., *Does the long-term administration of proton pump inhibitors increase the risk of adverse cardiovascular outcomes? A ChatGPT powered umbrella review.* ACTA CARDIOLOGICA, 2023. **78**(9): p. 980–988.

101. Lebhar, M.S., et al., *Dr. ChatGPT: Utilizing Artificial Intelligence in Surgical Education.* The Cleft palate-craniofacial journal : official publication of the American Cleft Palate-Craniofacial Association, 2023: p. 10556656231193966-10556656231193966.

102. Molligoda Arachchige, A.S.P., *Early applications of ChatGPT in medical practice, education and research.* Clinical Medicine(Lond), 2023. **23**(4): p. 429–430.

103. Arachchige, A., *Early applications of ChatGPT in medical practice, education and research.* Clinical Medicine(Lond), 2023. **23**(4): p. 429-430.

104. Bilal, M., et al., *Enhancing Awareness and Self-diagnosis of Obstructive Sleep Apnea Using AI-Powered Chatbots: The Role of ChatGPT in Revolutionizing Healthcare.* ANNALS OF BIOMEDICAL ENGINEERING, 2023. **52**(2): p. 136–138.

105. Yue, Z., et al., *Enhancing Diabetes Self-management and Education: A Critical Analysis of ChatGPT's Role.* ANNALS OF BIOMEDICAL ENGINEERING, 2023. **52**(4): p. 741–744.

106. Almazyad, M., et al., *Enhancing Expert Panel Discussions in Pediatric Palliative Care: Innovative Scenario Development and Summarization With ChatGPT-4.* Cureus, 2023. **15**(4): p. e38249-e38249.

107. Gebrael, G., et al., *Enhancing Triage Efficiency and Accuracy in Emergency Rooms for Patients with Metastatic Prostate Cancer: A Retrospective Analysis of Artificial Intelligence-Assisted Triage Using ChatGPT 4.0.* Cancers, 2023. **15**(14): p. 3717.

108. Aditama, M.H.R., et al., *Epistemic justice of ChatGPT in first aid for child-adolescent mental health issues.* JOURNAL OF PUBLIC HEALTH, 2023. **45**(4): p. e816-e817.

109. Changyu, W., et al., *Ethical Considerations of Using ChatGPT in Health Care.* Journal of medical Internet research, 2023. **25**: p. e48009-e48009.

110. Ayers, J.W., et al., *Evaluating Artificial Intelligence Responses to Public Health Questions.* JAMA network open, 2023. **6**(6): p. e2317517-e2317517.

111. Seth, I., et al., *Evaluating Chatbot Efficacy for Answering Frequently Asked Questions in Plastic Surgery: A ChatGPT Case Study Focused on Breast Augmentation.* Aesthetic Surgery Journal, 2023. **43**(10): p. 1126–1135.

112. Campbell, D.J., et al., *Evaluating ChatGPT responses on obstructive sleep apnea for patient education.* Journal of Clinical Sleep Medicine, 2023. **19**(12): p. 1989-1995.

113. Holmes, J., et al., *Evaluating large language models on a highly-specialized topic, radiation oncology physics.* FRONTIERS IN ONCOLOGY, 2023. **13**: p. 1219326.

114. Davis, R., et al., *Evaluating the Effectiveness of Artificial Intelligence–powered Large Language Models Application in Disseminating Appropriate and Readable Health Information in Urology.* Journal of Urology, 2023. **210**(4): p. 688-694.

115. Cascella, M., et al., *Evaluating the Feasibility of ChatGPT in Healthcare: An Analysis of Multiple Clinical and Research Scenarios.* JOURNAL OF MEDICAL SYSTEMS, 2023. **47**(1): p. 33.

116. Giannos, P., *Evaluating the limits of AI in medical specialisation: ChatGPT's performance on the UK Neurology Specialty Certificate Examination.* BMJ neurology open, 2023. **5**(1): p. e000451-e000451.

117. Koga, S., N.B. Martin, and D.W. Dickson, *Evaluating the performance of large language models: ChatGPT and Google Bard in generating differential diagnoses in clinicopathological conferences of neurodegenerative disorders.* Brain pathology (Zurich, Switzerland), 2023: p. e13207-e13207.

118. Khanna, R.K., et al., *Evaluating the potential of ChatGPT-4 in ophthalmology: The good, the bad and the ugly.* Journal francais d'ophtalmologie, 2023. **46**(7): p. 697–705.

119. Hurley, E.T., et al., *Evaluation High-Quality of Information from ChatGPT (Artificial Intelligence--Large Language Model)Artificial Intelligence on Shoulder Stabilization Surgery.* Arthroscopy : the journal of arthroscopic & related surgery : official publication of the Arthroscopy Association of North America and the International Arthroscopy Association, 2023. **40**(3): p. 726–731.e6.

120. Kusunose, K., S. Kashima, and M. Sata, *Evaluation of the Accuracy of ChatGPT in Answering Clinical Questions on the Japanese Society of Hypertension Guidelines.* Circulation journal : official journal of the Japanese Circulation Society, 2023. **87**(7): p. 1030-1033.

121. Yi, X., et al., *Evaluation of the Artificial Intelligence Chatbot on Breast Reconstruction and Its Efficacy in Surgical Research: A Case Study.* AESTHETIC PLASTIC SURGERY, 2023. **47**(6): p. 2360-2369.

122. Henson, J.B., et al., *Evaluation of the Potential Utility of an Artificial Intelligence Chatbot in Gastroesophageal Reflux Disease Management.* The American journal of gastroenterology, 2023. **118**(12): p. 2276–2279.

123. Jiaming, Z., et al., *Exploring ChatGPT's Potential for Consultation, Recommendations and Report Diagnosis: Gastric Cancer and Gastroscopy Reports' Case.* International Journal of Interactive Multimedia and Artificial Intelligence, 2023. **8**(2): p. 7-13.

124. Hamed, E., A. Eid, and M. Alberry, *Exploring ChatGPT's Potential in Facilitating Adaptation of Clinical Guidelines: A Case Study of Diabetic Ketoacidosis Guidelines.* Cureus, 2023. **15**(5): p. e38784-e38784.

125. Li, S., *Exploring the clinical capabilities and limitations of ChatGPT: a cautionary tale for medical applications.* International journal of surgery (London, England), 2023. **109**(9): p. 2865–2867.

126. Buzzaccarini, G., et al., *Exploring the Potential of Artificial Intelligence in Providing Infertility Consultations and Answers: can it replace the infertility specialist? A hybrid study.* Human Reproduction, 2023. **38**: p. i174.

127. Kaarre, J., et al., *Exploring the potential of ChatGPT as a supplementary tool for providing orthopaedic information.* KNEE SURGERY SPORTS TRAUMATOLOGY ARTHROSCOPY, 2023. **31**(11): p. 5190–5198.

128. Chiesa-Estomba, C.M., et al., *Exploring the potential of Chat-GPT as a supportive tool for sialendoscopy clinical decision making and patient information support.* EUROPEAN ARCHIVES OF OTO-RHINO-LARYNGOLOGY, 2023. **281**(4): p. 2081–2086.

129. Seth, I., et al., *Exploring the Role of a Large Language Model on Carpal Tunnel Syndrome Management: AnObservation Study of ChatGPT.* The Journal of hand surgery, 2023. **48**(10): p. 1025–1033.

130. Levin, G., Y. Brezinov, and R. Meyer, *Exploring the use of ChatGPT in OBGYN: a bibliometric analysis of the first ChatGPT-related publications.* ARCHIVES OF GYNECOLOGY AND OBSTETRICS, 2023. **308**(6): p. 1785–1789.

131. Dossantos, J., J. An, and R. Javan, *Eyes on AI: ChatGPT's Transformative Potential Impact on Ophthalmology.* Cureus, 2023. **15**(6): p. e40765-e40765.

132. van de Ridder, J.M.M., M.M. Shoja, and V. Rajput, *Finding the Place of ChatGPT in Medical Education.* Academic Medicine, 2023. **98**(8): p. 867-867.

133. Hanyin, W., Y.J. Ding, and L. Yuan, *Future of ChatGPT in Pharmacovigilance.* Drug Safety, 2023. **46**(8): p. 711-713.

134. Tustumi, F., N.A. Andreollo, and J.E.d. Aguilar-Nascimento, *Future of the Language Models in Healthcare: The Role of Chatgpt.* ABCD. Arquivos Brasileiros de Cirurgia Digestiva (São Paulo), 2023. **36**: p. e1727.

135. Waisberg, E., et al., *GPT-4: a new era of artificial intelligence in medicine.* IRISH JOURNAL OF MEDICAL SCIENCE, 2023. **192**(6): p. 3197–3200.

136. Gemingtian, L., et al., *GPT4: The Indispensable Helper for Neurosurgeons in the New Era.* ANNALS OF BIOMEDICAL ENGINEERING, 2023. **51**(10): p. 2113–2115.

137. Thomas, S.P., *Grappling with the Implications of ChatGPT for Researchers, Clinicians, and Educators.* Issues in Mental Health Nursing, 2023. **44**(3): p. 141-142.

138. Gorelik, Y., et al., *Harnessing Language Models for Streamlined Post-Colonoscopy Patient Management: A Novel Approach.* Gastrointestinal endoscopy, 2023. **98**(4): p. 639–641.

139. Lanzano, G., *Harnessing the Potential of ChatGPT in Breast Reconstruction: A Revolution in Patient Communication and Education.* AESTHETIC PLASTIC SURGERY, 2023. **47**(5): p. 2215–2216.

140. Kavian, J.A., et al., *Harvesting the Power of Artificial Intelligence for Surgery: Uses, Implications, and Ethical Considerations.* AMERICAN SURGEON, 2023. **89**(12): p. 5102–5104.

141. Kanter, G.P. and E.A. Packel, *Health Care Privacy Risks of AI Chatbots.* JAMA-JOURNAL OF THE AMERICAN MEDICAL ASSOCIATION, 2023. **330**(4): p. 311–312.

142. Bhattacharyya, M., et al., *High Rates of Fabricated and Inaccurate References in ChatGPT-Generated Medical Content.* Cureus, 2023. **15**(5): p. e39238-e39238.

143. Alessandri Bonetti, M., et al., *How Does ChatGPT Perform on the Italian Residency Admission National Exam Compared to 15,869 Medical Graduates?* ANNALS OF BIOMEDICAL ENGINEERING, 2023. **52**(4): p. 745-749.

144. Hao, L., P. Yifan, and W. Chunhua, *How Good Is ChatGPT for Medication Evidence Synthesis?* Studies in health technology and informatics, 2023. **302**: p. 1062-1066.

145. Atallah, S.B., et al., *How large language models including generative pre-trained transformer (GPT) 3 and 4 will impact medicine and surgery.* TECHNIQUES IN COLOPROCTOLOGY, 2023. **27**(8): p. 609-614.

146. Yoshinari Junior, G.H. and L.M. Vitorino, *How may ChatGPT impact medical teaching?* REVISTA DA ASSOCIACAO MEDICA BRASILEIRA, 2023. **69**(4): p. e20230282.

147. Calleja-Lopez, J.R.T., C.N. Rivera-Rosas, and E. Ruibal-Tavares, *Impact of ChatGPT and Artificial Intelligence in the Contemporary Medical Landscape.* Archives of medical research, 2023. **54**(5): p. 102835-102835.

148. Miao, H. and H. Ahn, *Impact of ChatGPT on Interdisciplinary Nursing Education and Research.* Asian/Pacific Island nursing journal, 2023. **7**: p. e48136-e48136.

149. Chow, J.C.L., L. Sanders, and L. Kay, *Impact of ChatGPT on medical chatbots as a disruptive technology.* Frontiers in artificial intelligence, 2023. **6**: p. 1166014-1166014.

150. Alanzi, T.M., *Impact of ChatGPT on Teleconsultants in Healthcare: Perceptions of Healthcare Experts in Saudi Arabia.* Journal of Multidisciplinary Healthcare, 2023. **14**(16): p. 2309-2321.

151. Tiwari, A., et al., *Implications of ChatGPT in Public Health Dentistry: A Systematic Review.* Cureus, 2023. **15**(6): p. e40367-e40367.

152. Eggmann, F., et al., *Implications of large language models such as ChatGPT for dental medicine.* JOURNAL OF ESTHETIC AND RESTORATIVE DENTISTRY, 2023. **35**(7): p. 1098–1102.

153. Yue, Z., et al., *Innovating Healthcare: The Role of ChatGPT in Streamlining Hospital Workflow in the Future.* ANNALS OF BIOMEDICAL ENGINEERING, 2023. **52**(4): p. 750–753.

154. Aditama, M.H.R., M.L. Mangantes, and T.M. Tiwa, *Is ChatGPT worth using in first aid for mental health issues?* JOURNAL OF PUBLIC HEALTH, 2023. **45**(4): p. e814-e815.

155. Arachchige, A.S.P.M.S., *Large language models (LLM) and ChatGPT: a medical student perspective.* EUROPEAN JOURNAL OF NUCLEAR MEDICINE AND MOLECULAR IMAGING, 2023. **50**(8): p. 2248-2249.

156. Alberts, I.L., et al., *Large language models (LLM) and ChatGPT: what will the impact on nuclear medicine be?* EUROPEAN JOURNAL OF NUCLEAR MEDICINE AND MOLECULAR IMAGING, 2023. **50**(6): p. 1549-1552.

157. Abi-Rafeh, J., et al., *Large Language Models and Artificial Intelligence: A Primer for Plastic Surgeons on the Demonstrated & Potential Applications, Promises, and Limitations of ChatGPT.* Aesthetic Surgery Journal, 2023. **44**(3): p. 329-343.

158. Bair, H. and J. Norden, *Large Language Models and Their Implications on Medical Education.* Academic medicine : journal of the Association of American Medical Colleges, 2023. **98**(8): p. 869-870.

159. Abd-Alrazaq, A., et al., *Large Language Models in Medical Education: Opportunities, Challenges, and Future Directions.* JMIR medical education, 2023. **9**: p. e48291-e48291.

160. Thirunavukarasu, A.J., *Large language models will not replace healthcare professionals: curbing popular fears and hype.* JOURNAL OF THE ROYAL SOCIETY OF MEDICINE, 2023. **116**(5): p. 181-182.

161. Ali, H., *Letter 1 regarding "Assessing the performance of ChatGPT in answering questions regarding cirrhosis and hepatocellular carcinoma".* Clinical and molecular hepatology, 2023. **29**(3): p. 813-814.

162. Ray, P.P. and P. Majumder, *Letter to the editor - Dr ChatGPT in cardiovascular nursing: a deeper dive into trustworthiness, value, and potential risks.* EUROPEAN JOURNAL OF CARDIOVASCULAR NURSING, 2023. **23**(1): p. e11–e12.

163. Faraji, N., et al., *Letter to the Editor: ChatGPT's contribution to cancer study.* Journal of cancer research and clinical oncology, 2023. **149**(14): p. 13495–13500.

164. Adams, D. and L.A. Eramo, *Leveraging ChatGPT and Generative AI in Healthcare Analytics.* Journal of AHIMA, 2023: p. 1-1.

165. Haman, M., M. Skolnik, and T. Subrt, *Leveraging ChatGPT for Human Behavior Assessment: Potential Implications for Mental Health Care.* ANNALS OF BIOMEDICAL ENGINEERING, 2023. **51**(11): p. 2362–2364.

166. Corsello, A. and A. Santangelo, *May Artificial Intelligence Influence Future Pediatric Research?-The Case of ChatGPT.* CHILDREN-BASEL, 2023. **10**(4): p. 757.

167. Le, D.P. and S.C. Hall, *Medical Literature Writing With ChatGPT: A Rare Case of Choriocarcinoma Syndrome With Hemorrhagic Brain Metastases Due to Burned Out Metastatic Mixed Testicular Cancer.* Cureus, 2023. **15**(3): p. e36655-e36655.

168. Chakraborty, C., M. Bhattacharya, and S.-S. Lee, *Need an AI-Enabled, Next-Generation, Advanced ChatGPT or Large Language Models (LLMs) for Error-Free and Accurate Medical Information.* ANNALS OF BIOMEDICAL ENGINEERING, 2023. **52**(2): p. 134–135.

169. Smith, A., et al., *Old dog, new tricks? Exploring the potential functionalities of ChatGPT in supporting educational methods in social psychiatry.* International Journal of Social Psychiatry, 2023. **69**(8): p. 1882-1889.

170. Kleebayoon, A. and V. Wiwanitkit, *Orthopaedics and ChatGPT: correspondence.* International Orthopaedics, 2023. **47**(10): p. 2625.

171. Temsah, O., et al., *Overview of Early ChatGPT's Presence in Medical Literature: Insights From a Hybrid Literature Review by ChatGPT and Human Experts.* Cureus, 2023. **15**(4): p. e37281-e37281.

172. Hongyan, W., et al., *Performance and exploration of ChatGPT in medical examination, records and education in Chinese: Pave the way for medical AI.* International journal of medical informatics, 2023. **177**: p. 105173-105173.

173. Morath, B., et al., *Performance and risks of ChatGPT used in drug information: an exploratory real-world analysis.* EUROPEAN JOURNAL OF HOSPITAL PHARMACY, 2023.

174. Mihalache, A., M.M. Popovic, and R.H. Muni, *Performance of an Artificial Intelligence Chatbot in Ophthalmic Knowledge Assessment.* JAMA OPHTHALMOLOGY, 2023. **141**(6): p. 589–597.

175. Fernández-Cisnal, A., et al., *Performance of an artificial intelligence chatbot with web search capability in cardiology-related assistance: a simulation study.* Revista Española de Cardiología (English Edition), 2023. **76**(12): p. 1065-1067.

176. Bhayana, R., S. Krishna, and R.R. Bleakney, *Performance of ChatGPT on a Radiology Board-style Examination: Insights into Current Strengths and Limitations.* Radiology, 2023. **307**(5): p. e230582-e230582.

177. Borchert, R.J., et al., *Performance of ChatGPT on the Situational Judgement Test-A Professional Dilemmas-Based Examination for Doctors in the United Kingdom.* JMIR medical education, 2023. **9**: p. e48978-e48978.

178. Jansz, J., H.W. Tran, and N.J. Sweiss, *Pitfalls in the Diagnosis and Management of an Unusual Presentation of Clinically Amyopathic Dermatomyositis: A Case Report Written With the Assistance of ChatGPT.* Cureus, 2023. **15**(7): p. e41879.

179. Sng, G.G.R., et al., *Potential and Pitfalls of ChatGPT and Natural-Language Artificial Intelligence Models for Diabetes Education.* Diabetes care, 2023. **46**(5): p. e103-e105.

180. Kluger, N., *Potential applications of ChatGPT in dermatology.* J Eur Acad Dermatol Venereol, 2023. **37**(7): p. e941-e942.

181. Wang, C., et al., *Potential for GPT Technology to Optimize Future Clinical Decision-Making Using Retrieval-Augmented Generation.* ANNALS OF BIOMEDICAL ENGINEERING, 2023. **52**(5): p. 1115–1118.

182. Elkassem, A.A. and A.D. Smith, *Potential Use Cases for ChatGPT in Radiology Reporting.* American Journal of Roentgenology, 2023. **221**(3): p. 373-376.

183. Tsang, R., *Practical Applications of ChatGPT in Undergraduate Medical Education.* Journal of medical education and curricular development, 2023. **10**: p. 23821205231178449-23821205231178449.

184. Mohammed, M., et al., *Psychometric Properties and Assessment of Knowledge, Attitude, and Practice Towards ChatGPT in Pharmacy Practice and Education: a Study Protocol.* Journal of racial and ethnic health disparities, 2023.

185. Nov, O., N. Singh, and D. Mann, *Putting ChatGPT's Medical Advice to the (Turing) Test: Survey Study.* JMIR medical education, 2023. **9**: p. e46939-e46939.

186. Cocci, A., et al., *Quality of information and appropriateness of ChatGPT outputs for urology patients.* Prostate cancer and prostatic diseases, 2023. **27**(1): p. 103–108.

187. Zhavoronkov, A., *Rapamycin in the context of Pascal’s Wager: generative pre-trained transformer perspective.* Oncoscience, 2022. **9**: p. 82-84.

188. Seth, I., G. Bulloch, and C.H.A. Lee, *Redefining Academic Integrity, Authorship, and Innovation: The Impact of ChatGPT on Surgical Research.* Ann Surg Oncol, 2023. **30**(8): p. 5284-5285.

189. Elkassem, A.A. and A.D. Smith, *Reply to “Addressing Concerns and Pitfalls in ChatGPT-Driven Radiology Reporting”.* American Journal of Roentgenology, 2023. **221**(3): p. 403-404.

190. Calleja-Lopez, J.R.T., et al., *Reply to: ChatGPT and Artificial Intelligence in the Contemporary Medical Landscape: Commentary.* Archives of medical research, 2023. **54**(6): p. 102858-102858.

191. Wagner, M.W. and B.B. Ertl-Wagner, *Response to ChatGPT in Radiology: A Deeper Look Into its Limitations and Potential Pathways for Improvement.* Canadian Association of Radiologists Journal, 2023. **75**(1): p. 203.

192. Kim, J.K., et al., *Response to letter to the Editor re ChatGPT and large language model (LLM) chatbots: The current state of acceptability and a proposal for guidelines on utilization in academic medicine.* Journal of pediatric urology, 2023. **19**(5): p. 607.

193. Qiao, J., R. Leaman, and L. Zhiyong, *Retrieve, Summarize, and Verify: How Will ChatGPT Affect Information Seeking from the Medical Literature?* Journal of the American Society of Nephrology : JASN, 2023. **34**(8): p. 1302-1304.

194. Zhiqiang, L., et al., *Revolutionary Potential of ChatGPT in Constructing Intelligent Clinical Decision Support Systems.* ANNALS OF BIOMEDICAL ENGINEERING, 2023. **52**(2): p. 125–129.

195. Hasnain, M., A. Hayat, and A. Hussain, *Revolutionizing Chronic Obstructive Pulmonary Disease Care with the Open AI Application: ChatGPT.* ANNALS OF BIOMEDICAL ENGINEERING, 2023. **51**(10): p. 2100–2102.

196. Xiao, D., et al., *Revolutionizing Healthcare with ChatGPT: An Early Exploration of an AI Language Model's Impact on Medicine at Large and its Role in Pediatric Surgery.* Journal of pediatric surgery, 2023. **58**(12): p. 2410–2415.

197. Ali, H., et al., *Revolutionizing Healthcare with Foundation AI Models.* Studies in health technology and informatics, 2023. **305**: p. 469-470.

198. Wenbo, L., et al., *Revolutionizing Neurosurgery with GPT-4: A Leap Forward or Ethical Conundrum?* ANNALS OF BIOMEDICAL ENGINEERING, 2023. **51**(10): p. 2105–2112.

199. Castonguay, A., et al., *Revolutionizing nursing education through Ai integration: A reflection on the disruptive impact of ChatGPT.* Nurse Education Today, 2023. **129**: p. 105916.

200. Lecler, A., L. Duron, and P. Soyer, *Revolutionizing radiology with GPT-based models: Current applications, future possibilities and limitations of ChatGPT.* Diagn Interv Imaging, 2023. **104**(6): p. 269-274.

201. Lourenco, A.P., P.J. Slanetz, and G.L. Baird, *Rise of ChatGPT: It May Be Time to Reassess How We Teach and Test Radiology Residents.* Radiology, 2023. **307**(5): p. e231053.

202. Benichou, L., *Role de l'utilisation de l'intelligence artificielle ChatGPT dans la redaction des articles scientifiques medicaux The Role of Using ChatGPT AI in Writing Medical Scientific Articles.* Journal of stomatology, oral and maxillofacial surgery, 2023. **124**(7944): p. 101456.

203. Biswas, S.S., *Role of Chat GPT in Public Health.* ANNALS OF BIOMEDICAL ENGINEERING, 2023. **51**(5): p. 868-869.

204. Biswas, S.S., *Role of ChatGPT in radiology with a focus on pediatric radiology: proof by examples.* Pediatr Radiol, 2023. **53**(5): p. 818-822.

205. Datt, M., et al., *Role of ChatGPT-4 for Medical Researchers.* ANNALS OF BIOMEDICAL ENGINEERING, 2023.

206. Alfertshofer, M., et al., *Sailing the Seven Seas: A Multinational Comparison of ChatGPT's Performance on Medical Licensing Examinations.* ANNALS OF BIOMEDICAL ENGINEERING, 2023.

207. Gupta, P., R. Nayak, and M. Alazzeh, *The Accuracy of Medical Diagnoses in Emergency Medicine by Modern Artificial Intelligence.* Academic Emergency Medicine, 2023. **30**: p. 395.

208. Buzzaccarini, G., R.S. Degliuomini, and M. Borin, *The Artificial Intelligence application in Aesthetic Medicine: How ChatGPT can Revolutionize the Aesthetic World.* AESTHETIC PLASTIC SURGERY, 2023. **47**(5): p. 2211–2212.

209. Minssen, T., E. Vayena, and I.G. Cohen, *The Challenges for Regulating Medical Use of ChatGPT and Other Large Language Models.* JAMA-JOURNAL OF THE AMERICAN MEDICAL ASSOCIATION, 2023. **330**(4): p. 315–316.

210. Chen, R., et al., *The chatbots are coming: Risks and benefits of consumer-facing artificial intelligence in clinical dermatology.* Journal of the American Academy of Dermatology, 2023. **89**(4): p. 872–874.

211. Mesko, B., *The ChatGPT (Generative Artificial Intelligence) Revolution Has Made Artificial Intelligence Approachable for Medical Professionals.* JOURNAL OF MEDICAL INTERNET RESEARCH, 2023. **25**: p. e48392.

212. Bradshaw, J.C., *The ChatGPT Era: Artificial Intelligence in Emergency Medicine.* ANNALS OF EMERGENCY MEDICINE, 2023. **81**(6): p. 764-765.

213. Zhimin, T., H. Qiyu, and F. Shijian, *The collision of ChatGPT and traditional medicine: perspective from bibliometric analysis.* International journal of surgery (London, England), 2023. **109**(11): p. 3713–3714.

214. Ferreira, A.L. and J.B. Lipoff, *The complex ethics of applying ChatGPT and language model artificial intelligence in dermatology.* Journal of the American Academy of Dermatology, 2023. **89**(4): p. e157–e158.

215. Heng, J.J.Y., D.B. Teo, and L.F. Tan, *The impact of Chat Generative Pre-trained Transformer (ChatGPT) on medical education.* POSTGRADUATE MEDICAL JOURNAL, 2023. **99**(1176): p. 1125–1127.

216. Ahmed, S.K., *The Impact of ChatGPT on the Nursing Profession: Revolutionizing Patient Care and Education.* ANNALS OF BIOMEDICAL ENGINEERING, 2023. **51**(11): p. 2351-2352.

217. Ahn, S., *The impending impacts of large language models on medical education.* Korean journal of medical education, 2023. **35**(1): p. 103-107.

218. Koo, M., *The Importance of Proper Use of ChatGPT in Medical Writing.* Radiology, 2023. **307**(3): p. e230312-e230312.

219. Wang, L.K., P.S. Paidisetty, and A.M. Cano, *The next paradigm shift? ChatGPT, artificial intelligence, and medical education.* Med Teach, 2023. **45**(8): p. 925.

220. Baumgartner, C., *The opportunities and pitfalls of ChatGPT in clinical and translational medicine.* Clinical and Translational Medicine, 2023. **13**(3): p. e1206.

221. Baumgartner, C., *The potential impact of ChatGPT in clinical and translational medicine.* CLINICAL AND TRANSLATIONAL MEDICINE, 2023. **13**(3).

222. Jing, Y., et al., *The Potential of ChatGPT in Assisting Children with Down Syndrome.* ANNALS OF BIOMEDICAL ENGINEERING, 2023. **51**(12): p. 2638–2640.

223. Koga, S., *The Potential of ChatGPT in Medical Education: Focusing on USMLE Preparation.* ANNALS OF BIOMEDICAL ENGINEERING, 2023. **51**(10): p. 2123–2124.

224. Kunming, C., et al., *The Potential of GPT-4 as an AI-Powered Virtual Assistant for Surgeons Specialized in Joint Arthroplasty.* ANNALS OF BIOMEDICAL ENGINEERING, 2023. **51**(7): p. 1366-1370.

225. Chervenak, J., et al., *The promise and peril of using a large language model to obtain clinical information: ChatGPT performs strongly as a fertility counseling tool with limitations.* Fertility and sterility, 2023. **120**(3 Pt 2): p. 575–583.

226. Arora, A. and A. Arora, *The promise of large language models in health care.* LANCET, 2023. **401**(10377): p. 641-642.

227. Mohammad, B., et al., *The Pros and Cons of Using ChatGPT in Medical Education: A Scoping Review.* Studies in health technology and informatics, 2023. **305**: p. 644-647.

228. Lee, H., *The rise of ChatGPT: Exploring its potential in medical education.* ANATOMICAL SCIENCES EDUCATION, 2023.

229. Mardikaningsih, A., et al., *The risk of ChatGPT as a first aid method: considering the potential danger for mental health support among young adults without professional assistance.* JOURNAL OF PUBLIC HEALTH, 2023. **45**(4): p. e823–e824.

230. Ufuk, F., *The Role and Limitations of Large Language Models Such as ChatGPT in Clinical Settings and Medical Journalism.* Radiology, 2023. **307**(3): p. e230276-e230276.

231. Sevgi, U.T., et al., *The role of an open artificial intelligence platform in modern neurosurgical education: a preliminary study.* Neurosurgical Review, 2023. **46**(1): p. 86.

232. Cohen, F., *The role of artificial intelligence in headache medicine: Potential and peril.* HEADACHE, 2023. **63**(5): p. 694–696.

233. Ashraf, H. and H. Ashfaq, *The Role of ChatGPT in Medical Research: Progress and Limitations.* ANNALS OF BIOMEDICAL ENGINEERING, 2023. **52**(3): p. 458–461.

234. Breeding, T., et al., *The Utilization of ChatGPT in Reshaping Future Medical Education and Learning Perspectives: A Curse or a Blessing?* AMERICAN SURGEON, 2023. **90**(4): p. 560–566.

235. Kleinig, O., C. Gao, and S. Bacchi, *This too shall pass: the performance of ChatGPT-3.5, ChatGPT-4 and New Bing in an Australian medical licensing examination.* MEDICAL JOURNAL OF AUSTRALIA, 2023. **219**(5): p. 237.

236. McLean, A.L., *Towards Precision Medicine in Spinal Surgery: Leveraging AI Technologies.* ANNALS OF BIOMEDICAL ENGINEERING, 2023. **52**(4): p. 735–737.

237. Nazario-Johnson, L., H.A. Zaki, and G.A. Tung, *Use of Large Language Models to Predict Neuroimaging.* Journal of the American College of Radiology, 2023. **20**(10): p. 1004–1009.

238. Siru, L., et al., *Using AI-generated suggestions from ChatGPT to optimize clinical decision support.* JOURNAL OF THE AMERICAN MEDICAL INFORMATICS ASSOCIATION, 2023. **30**(7): p. 1237-1245.

239. Arun Babu, T. and V. Sharmila, *Using artificial intelligence chatbots like 'ChatGPT' to draft articles for medical journals - Advantages, limitations, ethical concerns and way forward.* Eur J Obstet Gynecol Reprod Biol, 2023. **286**: p. 151.

240. Scerri, A. and K.H.H. Morin, *Using chatbots like ChatGPT to support nursing practice.* JOURNAL OF CLINICAL NURSING, 2023. **32**(15-16): p. 4211-4213.

241. Johnson, S.B., et al., *Using ChatGPT to evaluate cancer myths and misconceptions: artificial intelligence and cancer information.* JNCI cancer spectrum, 2023. **7**(2): p. pkad015.

242. Jialin, L., W. Changyu, and L. Siru, *Utility of ChatGPT in Clinical Practice.* Journal of medical Internet research, 2023. **25**: p. e48568-e48568.

243. Gupta, R., et al., *Utilization of ChatGPT for Plastic Surgery Research: Friend or Foe?* J Plast Reconstr Aesthet Surg, 2023. **80**: p. 145-147.

244. Cox, A., et al., *Utilizing ChatGPT-4 for Providing Medical Information on Blepharoplasties to Patients.* AESTHETIC SURGERY JOURNAL, 2023. **43**(8): p. NP658-NP662.

245. Montastruc, F., et al., *Will artificial intelligence chatbots replace clinical pharmacologists? An exploratory study in clinical practice.* European journal of clinical pharmacology, 2023. **79**(10): p. 1375–1384.

246. Abdulai, A.F. and H. Lillian, *Will ChatGPT undermine ethical values in nursing education, research, and practice?* Nursing Inquiry, 2023. **30**(3): p. 1-3.

247. Yongbin, H., et al., *Will ChatGPT/GPT-4 be a Lighthouse to Guide Spinal Surgeons?* ANNALS OF BIOMEDICAL ENGINEERING, 2023. **51**(7): p. 1362-1365.
